1    Uncoupling DNA- and RNA-directed DNA methylation at

2    *Rasgrf1*

3    Erin T. Chu <sup>1</sup>, David H. Taylor <sup>2,#a</sup>, Margaret Hofstedt <sup>3</sup>, and

4    Paul D. Soloway<sup>1,2,4,5, \*</sup>

5    **AFFILIATIONS:**

6    <sup>1</sup> Field of Comparative Biomedical Sciences, Cornell University College of Veterinary

7    Medicine, Ithaca, NY 14853

8    <sup>2</sup> Field of Genetics, Genomics, and Development, Cornell University, Ithaca, NY 14853

9    <sup>3</sup> Department of Biological Sciences, Cornell University, Ithaca, NY 14853

10   <sup>4</sup> Department of Biomedical Sciences, Cornell University New York State College of

11   Veterinary Medicine, Ithaca, NY 14853

12   <sup>5</sup> Division of Nutritional Sciences, Cornell University, Ithaca, NY 14853

13   <sup>#a</sup> Current Address: Department of Molecular, Cellular, and Developmental Biology, Yale

14   University, New Haven, CT 06520

15   \* Corresponding author

16   Email: [soloway@cornell.edu](mailto:soloway@cornell.edu)

17

18 **ABSTRACT:**

19 Long noncoding RNAs (lncRNAs) have garnered much attention as possible links  
20 between DNA sequence and the protein factors that mediate DNA methylation.  
21 However, the mechanisms by which DNA methylation is directed to specific genomic  
22 locations remain poorly understood. We previously identified a lncRNA in mouse, the  
23 pitRNA, that was implicated in the control of DNA methylation at the imprinted *Rasgrf1*  
24 locus. The pitRNA is transcribed in the developing male germline antisense to the  
25 differentially methylated region (DMR) that harbors paternal allele methylation, and is  
26 driven by a series of tandem repeats that are necessary for imprinted methylation.  
27 MitoPLD, a factor necessary for piRNA biogenesis, both processes piRNAs from the  
28 pitRNA, and is necessary for complete methylation at the locus, along with piRNA  
29 binding proteins. Using two independent mouse systems where pitRNA transcription is  
30 driven by the doxycycline-inducible Tet Operator, we demonstrate that pitRNA  
31 transcription across the DMR is insufficient for imprinted methylation, and that the  
32 *Rasgrf1* repeats have additional, critical *cis*-acting roles for imparting DNA methylation to  
33 *Rasgrf1*, independently of their control of pitRNA transcription. Furthermore, pitRNA  
34 overexpression and oocyte loading of pitRNA is insufficient to induce transallelic and  
35 transgenerational effects previously reported for *Rasgrf1*. Notably, manipulation of the  
36 pitRNA with the *TetOFF* system led to transcriptional perturbations over a broad  
37 chromosomal region surrounding the inserted Tet Operator, revealing that the effects of  
38 this regulatory tool are not localized to a single target gene.

39

40 **AUTHOR SUMMARY:**

41 DNA methylation is a heritable genetic modification known to impact vital  
42 biological processes. While the proteins that establish, maintain, and remove DNA  
43 methylation are well characterized, the mechanisms by which these proteins are directed  
44 to specific genetic sequences are poorly understood. We have previously demonstrated  
45 that DNA methylation at the imprinted *Rasgrf1* locus requires a DNA element with a  
46 series of tandem repeats. These repeats act as a promoter for a long noncoding RNA,  
47 the pitRNA, which is targeted by a small noncoding RNA pathway known to silence viral  
48 elements in the male germline via DNA methylation. We queried the sufficiency of the  
49 pitRNA to mediate DNA methylation at *Rasgrf1*. We show that, in the absence of the  
50 repeats, the pitRNA expression is insufficient to establish imprinted methylation. This  
51 work supports a pitRNA-independent mechanism for methylation at *Rasgrf1*, and a  
52 critical *cis*-acting role for the tandem repeats separate from their control of pitRNA  
53 transcription.

54 **INTRODUCTION:**

55 DNA methylation is essential for appropriate embryonic development. While the  
56 *trans*-acting factors required to establish [1,2,3,4,5], maintain [6,7,8,9,10,11], and  
57 remove [12,13,14,15] DNA methylation have been identified, little is known of *cis*-acting  
58 elements that direct these *trans*-acting factors to specific genomic locations  
59 [16,17,18,19,20].

60 One such *cis* element exists at the imprinted *Rasgrf1* locus. In mouse and rat,  
61 *Rasgrf1* is paternally methylated and expressed in the neonatal brain. Imprinted  
62 expression in mouse is controlled by a differentially methylated region (DMR) 30 kb  
63 upstream of *Rasgrf1* coding sequence, and requires a 1.6 kb stretch of tandem repeats

64 immediately adjacent to the DMR. Targeted deletion of the *Rasgrf1* repeats  
65 (*Rasgrf1*<sup>tm1PDS</sup>, *tm1*) leads to loss of methylation at the *tm1* DMR in the male germline,  
66 and loss of imprinted *Rasgrf1* expression [21]. The repeats also play a role in the  
67 maintenance and spreading of DMR methylation in the embryonic somatic lineage after  
68 fertilization, though they are dispensable past the epiblast stage [22,23].

69 Our lab previously characterized a long noncoding RNA (lncRNA), the pitRNA,  
70 which is driven by the *Rasgrf1* repeats and is expressed in the embryonic male gonad  
71 [24]. lncRNAs, with their ability to recruit and bind effector proteins [25,26], represent a  
72 molecular class that could bridge the gap between the protein effectors of local  
73 epigenetic states if they recruit the effectors while being transcribed. Indeed, lncRNAs  
74 have been implicated in diverse biological processes, and have been proposed to  
75 modulate gene expression via a number of mechanisms including recruitment of histone  
76 modification complexes [27,28], transcriptional interference [29], and enhancer  
77 regulation [30].

78 Using the *Rasgrf1* repeats as a promoter, the pitRNA is transcribed antisense to  
79 the DMR, spanning an RMER4B element, an LTR-type retrotransposon. The repeats  
80 and RMER4B element are conserved at the *Rasgrf1* DMR in species where *Rasgrf1* is  
81 imprinted [31]. The pitRNA is processed into secondary piRNAs by the piRNA pathway,  
82 which is required for DNA methylation and transcriptional silencing of retrotransposons  
83 [32], and also for full methylation at the *Rasgrf1* DMR [24]. Given the apparent  
84 importance of the pitRNA and piRNA pathway in controlling methylation at *Rasgrf1*, we  
85 hypothesized that aberrant expression of the pitRNA could explain transallelic and  
86 transgenerational effects previously reported at *Rasgrf1* [33]. Indeed, aberrations in non-  
87 coding expression have been associated with such effects in other systems [34,35,36].

88 More recently, our lab targeted the *Wnt1* locus, inserting the *Rasgrf1* repeats and  
89 DMR between the *Wnt1* coding sequence and its annotated enhancer (*Wnt1*<sup>DR</sup>). We

90 found that when paternally transmitted, the *Wnt1<sup>DR</sup>* allele was methylated, recapitulating  
91 patterns of imprinted methylation found at *Rasgrf1*. However, pitRNA expression from  
92 the *Wnt1<sup>DR</sup>* was extremely low (less than 2% of the pitRNA expressed from the  
93 endogenous locus) [37]. These data suggested that the *Rasgrf1* repeats could impart  
94 methylation to their associated DMR independent of robust pitRNA expression.

95         None of the systems described above have uncoupled the pitRNA from the  
96 *Rasgrf1* repeats to ascertain necessity or sufficiency of either individual element for  
97 methylation in *cis* at the endogenous *Rasgrf1* locus. Here, we directly queried the  
98 sufficiency of the pitRNA to establish methylation at *Rasgrf1* using a targeted mutation in  
99 mouse, *Rasgrf1<sup>tm5.1PDS</sup>* (*tm5.1*) where the *Rasgrf1* repeats were replaced by the Tet  
100 Operator. This enabled inducible control of pitRNA expression through combination of  
101 *tm5.1* with one of two transactivating proteins: *TetON*, which binds the Tet Operator and  
102 drives pitRNA expression in the presence of doxycycline [38]; and *TetOFF*, which binds  
103 the Tet Operator and drives pitRNA expression in the absence of doxycycline [39,40].  
104 We found that induction of the pitRNA at physiologic levels in male gonocytes was  
105 insufficient to impart methylation to the *tm5.1* DMR, revealing a critical role for the  
106 repeats in methylation control, independent of their regulation of pitRNA transcription,  
107 consistent with our findings with *Wnt1<sup>DR</sup>*. Using *tm5.1* as well as a transgenic allele,  
108 *TetO $\Delta$ <sup>Tg</sup>*, we also determined that the pitRNA overexpression was insufficient to induce  
109 transgenerational or transallelic effects on *Rasgrf1* expression or methylation. Finally, in  
110 addition to enabling control of pitRNA expression as designed, *TetOFF* transactivation of  
111 *tm5.1* activated transcription across a broad chromatin domain previously shown to  
112 exhibit interactions, and that activation was not confined to the target sequences at the  
113 DMR. Our data identify a role for *Rasgrf1* repeats as a *cis*-element directing DNA  
114 methylation, independently of the pitRNA it drives. Furthermore, we show that

115 expression patterns controlled by engineered Tet repressor proteins can be exerted over  
116 large regions of the genome.

## 117 **RESULTS:**

### 118 **Generation of *Rasgrf1*<sup>tm5.OPDS</sup>.**

119 We successfully generated the targeted mutant *Rasgrf1*<sup>tm5.1PDS</sup> (*tm5.1*), where the  
120 endogenous repeats were replaced with the Tet Operator (Fig 1a). Allelic structure was  
121 validated by Southern blot, and Sanger sequencing of PCR products that spanned the  
122 vector ends and the endogenous sequence at the target locus, as well as by copy  
123 number qPCR (Fig S1a-d).

### 124 **The *tm5.1* allele lacks DMR methylation and *Rasgrf1* expression, like the** 125 ***Rasgrf1*<sup>tm1</sup> repeat-deficient allele.**

126  
127 We first characterized *tm5.1* in the absence of a transactivator. We expected  
128 that, in the absence of a transactivating protein, *tm5.1* would neither accrue methylation  
129 at its DMR or impart imprinted expression at *Rasgrf1*, similar to the repeat-deficient  
130 allele, *Rasgrf1*<sup>tm1</sup> (*tm1*). The *tm5.1* DMR was hypomethylated when paternally  
131 transmitted (+/*tm5.1*, Fig S2e), leading to minimal expression of *Rasgrf1* in the brain as  
132 measured by qRT-PCR (FigS2d); +/*tm5.1* animals were on average of lower body weight  
133 than wild-type littermates (Fig S2f), consistent with findings that repeat-deficient animals  
134 are underweight [41].

135 Also consistent with *tm1*, a portion of +/*tm5.1* animals were methylated at, and  
136 expressed *Rasgrf1* at wild-type levels from the *tm5.1* allele. Also as seen with the *tm1*  
137 allele, a portion of mice with the +/*tm5.1* genotype had *tm5.1* methylation and expression

138 in the N2 and N3 generations (4 out of 14 animals in the N2 generation; 2 out of 15  
139 animals in the N3 generation). Consistent with findings using repeat-deficient animals  
140 [41], this was a stochastic event, and the methylation status of *+tm5.1* offspring was not  
141 dependent on the methylation state of their *+tm5.1* fathers (Fig S2a-b).

#### 142 **Induction of pitRNA from *Rasgrf1*<sup>tm5.1PDS</sup> via the *TetON* and *TetOFF* systems.**

143 To ascertain transactivator-dependent induction of pitRNA, we then generated  
144 *tm5.1* mice expressing one of two transactivating proteins, *TetON* and *TetOFF*. As  
145 discussed in Methods, the *TetOFF* allele was generated from the commercially available  
146 *pA-TetOFF* allele, where *TetOFF* is preceded by a floxed neomycin-resistance  
147 polyadenylation cassette. The polyadenylation cassette was removed by embryonic day  
148 6.5 by crossing *pA-TetOFF* males with females carrying a *Cre* transgene driven by the  
149 *Sox2* promoter [42]. Successful Cre-mediated recombination was confirmed by Sanger  
150 sequencing of PCR products spanning the pA-cassette (Fig S3). We expected pitRNA  
151 transcription from the *tm5.1* allele would depend either on the *TetOFF* transgene in the  
152 absence of tetracycline, or the *TetON* transgene in the presence of doxycycline. We  
153 assayed pitRNA induction in several adult tissues by endpoint PCR, as well as by qPCR  
154 in the neonatal male germline, adult liver, neonatal brain, and oocytes. pitRNA induction  
155 from the *tm5.1* allele required a transactivating protein, and was expressed at  
156 physiological levels in the neonatal male embryonic germline of males (Fig 1b), and from  
157 10 to 1000-fold wild-type levels in adult tissues (Fig S4, Fig S7a) depending on the  
158 tissue assayed. In all tissues, pitRNA was silent in the absence of a transactivator.

159 **pitRNA induction in the male germline is insufficient for establishment of germline**  
160 **methylation at *Rasgrf1*.**

161           Having confirmed that pitRNA could be induced from *tm5.1* using both the *TetON*  
162 and the *TetOFF* systems, that expression in the neonatal germline was at physiologic  
163 levels, and that *tm5.1* was transcriptionally silent in the absence of a transactivator, we  
164 tested whether artificially regulated pitRNA expression was sufficient to impart  
165 methylation at the *Rasgrf1* DMR in the male germline, independently of the repeats that  
166 normally effect this regulation. To perform this analysis, we used gonads from male  
167 embryos heterozygous for the *tm5.1* allele that also carried the *TetOFF* or the *TetON*  
168 transgenes. We assayed methylation of the *tm5.1* and WT DMRs under conditions  
169 where the pitRNA is induced from the *tm5.1* allele. The use of heterozygotes enabled us  
170 to monitor methylation of both the *tm5.1* allele, with artificial regulation of the pitRNA  
171 from the Tet Operator, and the wild-type allele, as an internal control, which has natural  
172 regulation of the pitRNA from the repeats. gDNA was prepared from the gonocyte and  
173 somatic cell fractions of developing male gonads, and assayed for DMR methylation by  
174 targeted bisulfite sequencing (Fig 2a-d, S5a,b lower panels) and COBRA (Fig S5a,b  
175 upper panels), using assays specific for the *tm5.1* and wild-type alleles. Both assays  
176 revealed that the *tm5.1* DMR was hypomethylated in gonocytes from each of six mice  
177 tested, despite the proper regulation of pitRNA in the germline from the *tm5.1* allele. In  
178 contrast, the wild-type DMR from the same animals was hypermethylated, as expected.  
179 This pattern was observed in male gonocytes regardless of the parental modes of  
180 inheritance of the two alleles, or whether the *TetON* or *TetOFF* regulator was used. As a  
181 control for purity of germ cells, we performed BS-PCR and sequencing for the *Igf2r*  
182 DMR, which is methylated only upon maternal transmission, and found extensive  
183 hypomethylation, as expected for male germline cells [43]. We also assayed methylation  
184 states of the two alleles in somatic fractions of developing gonads. As with gonocytes,  
185 the *tm5.1* allele was unmethylated regardless of mode of inheritance or transactivator.  
186 As expected, the wild-type allele was hypermethylated upon paternal transmission, and



187 hypomethylated upon maternal transmission. Hypomethylation of the maternal DMR in  
188 somatic fractions demonstrated that pitRNA expression from the *tm5.1* allele does not  
189 act in *trans*.

190 We further assayed *tm5.1* and wild-type DMR methylation in mature sperm of  
191 *tm5.1* heterozygotes, where the pitRNA was regulated by *TetOFF* in the absence of  
192 doxycycline. As with gonocytes, the *tm5.1* DMR was consistently hypomethylated,  
193 whereas the wild-type DMR was methylated (Fig 2e and Fig S5c). We concluded that in  
194 the embryonic and mature male germlines, pitRNA expression alone was not sufficient  
195 to impart methylation at the *tm5.1* DMR in *cis*, indicating that the repeats perform an  
196 additional necessary function for DMR methylation, beyond controlling pitRNA  
197 expression.

198 **pitRNA induction in the male germline is insufficient for somatic methylation at**  
199 ***Rasgrf1*.**

200 In previous studies, exporting the *Rasgrf1* ICR to the *Wnt1* locus led to  
201 hypomethylation of the mutant allele in sperm, but hypermethylation in somatic tissue  
202 after fertilization [37]. Though sperm methylation at the modified *Wnt1* allele was higher  
203 than sperm methylation at the *tm5.1* allele, we determined if expression of pitRNA by  
204 TetO induction of the *tm5.1* allele could enable methylation in somatic tail DNA of  
205 progeny after paternal transmission. In all tail samples tested, the *tm5.1* allele remained  
206 unmethylated regardless of which transactivator was used to control pitRNA (Fig 3a-b).  
207 These findings demonstrated that like methylation in the male germline, methylation in  
208 somatic tissue of offspring after paternal transmission is not enabled by pitRNA  
209 expression alone. Instead, and consistent with findings from the *Wnt1* mutant allele,  
210 additional features of the repeats, beyond their control of pitRNA expression, are  
211 necessary for methylation.

212 ***tm5.1* transactivation and pitRNA induction leads to expression changes of**  
213 **neighboring genes.**

214 We expanded our initial analysis of methylation by characterizing expression  
215 states of *Rasgrf1* and nearby loci in mice carrying the *tm5.1* allele. *Rasgrf1* expression in  
216 neonatal brain requires either methylation of the DMR, which is a methylation-sensitive  
217 enhancer blocker, or ectopic insertion of an enhancer proximal to the *Rasgrf1* promoter  
218 [44]. We found that *TetOFF*-mediated *tm5.1* induction led to a tenfold upregulation of  
219 *Rasgrf1* in neonatal brain relative to wild-type regardless of the parental origin of the  
220 *tm5.1* allele. Sequencing *Rasgrf1* RT-PCR products revealed that *TetOFF*:+/*tm5.1*  
221 animals that inherited *tm5.1* paternally, expressed *Rasgrf1* solely from the paternal  
222 *tm5.1* allele (Fig 4a-c). *TetOFF*: *tm5.1*/+ animals that inherited *tm5.1* maternally  
223 expressed *Rasgrf1* from both the maternal and paternal alleles at a ratio of  
224 approximately 9:1, indicating there was a dramatic upregulation of *Rasgrf1* from the  
225 normally silent wildtype maternal allele, when it was replaced by *tm5.1*, and with  
226 transactivation by *TetOFF*. This was accompanied by continued *Rasgrf1* expression  
227 from the paternal wild-type allele (Fig 4a-c). We observed similar effects with *TetON*  
228 transactivator. Though the magnitude of *Rasgrf1* induction was lower, *TetON* also  
229 activated expression from the maternal *tm5.1* allele (Fig 4 d-f, Fig S6).

230 The *Rasgrf1* locus lies within two overlapping annotated regions of chromatin  
231 interaction, a smaller 150 kb and encompassing 250 kb region, as shown by cohesin  
232 ChIA-PET analysis of mouse embryonic stem cells [45] (Fig 5a). To define the extent of  
233 *TetOFF*-mediated transactivation, and its relationship to the bounds of known regions of  
234 interaction, we queried the effects of *TetOFF* on other transcripts within the interacting  
235 regions. In neonatal brain, all transcripts within the minimal 150kb interaction domain  
236 were upregulated in both *TetOFF*:+/*tm5.1* and *TetOFF*:*tm5.1*/+ animals, in a

237 transactivator dependent manner, indicating the effects of transactivation extended  
238 throughout the 150kb domain. Interestingly, *TetOFF*-dependent effects on brain  
239 expression of transcripts within the *tm5.1* domain varied, depending on parental origin of  
240 *tm5.1*, consistent with the existence of distinct chromosomal architecture for parental  
241 alleles within imprinted regions (Fig 5b). The allele-specific effects were even more  
242 dramatic when expression was assayed in neonatal testes: transcripts linked to *tm5.1*  
243 that were upregulated by *TetOFF* when *tm5.1* was maternally transmitted were  
244 downregulated when it was paternally transmitted. Additionally, the effects extended  
245 over a broader chromosomal domain in testes, and on the paternal chromosome,  
246 highlighting parental- and tissue-specific chromatin architecture at *Rasgrf1* (Fig 5c).

#### 247 **pitRNA loading of oocytes does not produce paramutation**

248 Previously, our lab described a paramutation-like phenomenon at *Rasgrf1*  
249 associated with the *Rasgrf1<sup>tm3.1PDS</sup>* allele (*tm3.1*), in which the repeats were replaced by  
250 the imprinting control region (ICR) of *Igf2r* [43]. Progeny carrying a paternal *tm3.1* allele  
251 exhibited a derepression of the maternal allele, as interpreted from endpoint RT-PCR;  
252 and further, some wild-type offspring of *+/tm3.1* females demonstrated continued  
253 depression of the maternal allele, though they lacked the original paternal allele that  
254 incited the derepression. This intergenerational effect is a key feature of paramutation.  
255 The *Igf2r* sequences in the *tm3.1* allele harbors the promoter for *Air*, a non-coding RNA  
256 that regulates imprinted expression at the locus [46]. Its presence and orientation in the  
257 *tm3.1* allele could impart novel expression patterns of the pitRNA; accordingly, we  
258 hypothesized that the intergenerational, paramutation-like effects could involve oocyte  
259 loading of pitRNA. To test this hypothesis, we treated females carrying the *tm5.1* allele,  
260 and the TetON activator, with intraperitoneal dox for three days, which led to oocyte  
261 pitRNA levels approximately 90-fold higher than in wild-type mice (Fig S7a). Females

262 subjected to these treatments were bred to wild-type males, and maintained on dox  
263 chow for the duration of pregnancy—as such, their *TetON:+/tm5.1* offspring were  
264 informative for somatic effects of pitRNA induction in oocytes (Fig S6). Additionally, their  
265 wild-type, *TetON:+/+*, and *+/tm5.1* offspring were informative for determining if pitRNA  
266 loading in oocytes could induce paramutation. In none of these offspring born to mothers  
267 with pitRNA preloaded in their oocytes did we observe effects on imprinting status or  
268 expression levels of *Rasgrf1* (FigS7c, d). COBRA analysis of the maternal *tm5.1* allele  
269 transmitted by oocytes preloaded with pitRNA showed that it remained hypomethylated  
270 (Fig S7e). We concluded that preloading oocytes to nearly 100-fold levels of pitRNA  
271 relative to wild-type was insufficient to induce transgenerational effects.

## 272 **DISCUSSION:**

### 273 **A model for DNA methylation at *Rasgrf1*.**

274 Despite the fundamental roles that DNA and histone modification states have for  
275 genome regulation, there have been only a handful of sequence elements identified that  
276 exert *cis*-acting control over these modification states [16-21]. We previously identified  
277 one such element at the *Rasgrf1* locus: It is a series of tandem repeats found 30 kb  
278 upstream of the imprinted *Rasgrf1* coding sequence, and lying immediately adjacent to  
279 the DMR, that are required both in the male germline for establishment of imprinted  
280 methylation at the DMR in sperm [21], and also in the pre-implantation embryo for  
281 maintenance of imprinted methylation in somatic lineages [23]. In addition to serving  
282 these functions, the repeats serve as a promoter for expression of the pitRNA in the  
283 male germline that spans the DMR, and which is processed into piRNAs. The distinct  
284 effects of lncRNAs, and the *cis*-elements that regulate them, have proven difficult to  
285 uncouple [47,48] with some success coming from the truncation of the lncRNA transcript

286 while keeping the *cis* element intact [49,50,51,52]. To assess the activity of the pitRNA  
287 separately from the repeats, we uncoupled the two by replacing the repeats with an  
288 artificial promoter based on TetO sequences (*tm5.1*), which regulated the pitRNA to  
289 physiologic levels in the developing male germline using the *TetON* and *TetOFF*  
290 transactivators. Of nine male embryos with this pitRNA regulation analyzed, only one  
291 displayed partial gonocyte and somatic methylation of *tm5.1*. This frequency is  
292 consistent with the frequency of DMR methylation observed in mouse models lacking the  
293 repeats [23, 41]. Properly regulated pitRNA expression from the *tm5.1* allele also failed  
294 to enable methylation in mature sperm, or in somatic DNA of progeny inheriting the  
295 *tm5.1* allele from their fathers. We therefore conclude that the pitRNA is insufficient to  
296 impart DNA methylation in *cis* and that *Rasgrf1* methylation requires critical functions in  
297 the repeats, separate from pitRNA expression (Fig 6).

298 Our findings that pitRNA expression is insufficient to control imprinted  
299 methylation of *Rasgrf1* are consistent with other work from our lab, in which the *Rasgrf1*  
300 DMR and repeats were exported to an ectopic site at the *Wnt1* locus. Paternal  
301 transmission of the modified *Wnt1* allele enabled complete methylation of the ectopic  
302 DMR in somatic DNA of the offspring despite germline expression of the pitRNA at only  
303 1% of the levels seen from the endogenous *Rasgrf1* locus; methylation of the *Wnt1* DMR  
304 in sperm DNA at only 30% of the levels found at the *Rasgrf1* DMR.

305 One interpretation of the present study, combined with the findings from the *Wnt1*  
306 study is that the pitRNA is irrelevant to *Rasgrf1* methylation: that instead, the repeats are  
307 both necessary and sufficient for this function, and the transcription of the pitRNA is an  
308 irrelevant sequela to some inherent activity at the repeats [reviewed in 53]. However,  
309 other data from our lab support a role for the pitRNA [24], likely by influencing the  
310 efficiency and/or timing of *Rasgrf1* methylation in a probabilistic way rather than in a  
311 deterministic way. This characterization is similar to the *Xite* element at the X-

312 Inactivation Center, which is transcribed, and mediates the probability with which an X  
313 chromosome undergoes X chromosome inactivation [54]. The probabilistic model for  
314 pitRNA function is also consistent with our findings that mice deficient for piRNA binding  
315 proteins MILI and MIWI2, as well as the piRNA biogenesis factor MitoPLD, have  
316 diminished methylation at the *Rasgrf1* DMR, though methylation is not completely lost  
317 [24]. Unless the piRNA factors are exerting their effects through the *Rasgrf1* repeats,  
318 and not through the pitRNA they in fact target for piRNA processing, the pitRNA is very  
319 likely to contribute to DMR methylation, despite not being absolutely required.

320         We also utilized the *tm5.1* allele to query whether previously observed  
321 intergenerational effects could be due to oocyte preloading of the pitRNA. Others have  
322 reported that gametic loading of RNAs could impart such effects to the next generation  
323 [35,36]. We achieved oocyte pitRNA levels up to 90-fold greater than wild-type by  
324 intraperitoneal doxycycline administration, however, this produced no effects on  
325 imprinted *Rasgrf1* expression or methylation in the wild-type offspring of females  
326 subjected to oocyte preloading of pitRNA.

327         The repeats have several features that might enable their control of local  
328 methylation states, separate from their control of pitRNA expression. Besides being  
329 highly repetitive, the GC-richness of the repeats might be sufficient to recruit methylation  
330 [55,56] which then spreads into the DMR. This is seen at *H19* where somatic  
331 methylation on the paternal arises adjacent to the germline DMR [57], and occurs when  
332 CTCF is unbound to the germline DMR [58,59,60,61,20]. Within the repeats are two  
333 canonical binding sites for the transcription factor Sp1, which besides its known role in  
334 the regulation of gene expression [62], can mediate chromatin structure through the  
335 recruitment of chromatin remodeling factors [63,64] and mediating enhancer-promoter  
336 interactions [65,66]. Sp1 is known to bind the secondary DNA structure G-quadruplexes  
337 (G4s) [67,68], which the *Rasgrf1* repeats are predicted to form, as well as its canonical

338 sequence. Recently, a G4 was characterized at the imprinted *H19* locus. Binding of Sp1,  
339 in conjunction with the G4, suppressed *H19* transcription [69]. To our knowledge, G-  
340 quadruplex formation at other imprinted loci beyond *H19* has not been investigated.  
341 However, differential G4 formation in the maternal and paternal germlines could be a  
342 platform upon which the distinct chromatin states observed at the maternal and paternal  
343 DMRs are built.

344 Our lab previously showed that, at the *Rasgrf1* DMR, H3K27Me and DNA  
345 methylation are mutually antagonistic, whereby the presence of one mark blocks the  
346 deposition of the other [22]. Placement of H3K27me3 requires YY1 and PRC2, which, in  
347 *Drosophila* [70] and likely in mammals [71], can be recruited to Sp1 sites. It is possible in  
348 the male germline, that Sp1 binding to the repeats excludes YY1 and PRC2 binding,  
349 enabling paternal allele methylation.

350 Other factors required for parent-of-origin specific DNA methylation might require  
351 the repeats for their recruitment. The GHKL ATPase Morc1 is a known repressor of  
352 transposable elements in the embryonic male germline; *Morc1*-null mice are  
353 hypomethylated at the *Rasgrf1* DMR [72]. The KRAB-domain containing zinc-finger  
354 binding protein ZFP57 and its cofactor Trim28 [73] are typically thought of as an  
355 imprinting maintenance mechanism. Loss of zygotic Trim28 disrupts imprinting at  
356 *Rasgrf1* along with many other maternally and paternally imprinted loci [74].  
357 Interestingly, KRAB-domain ZFP binding can also trigger *de novo* DNA methylation  
358 during mouse embryogenesis [75].

359

### 360 **Additional technical considerations for the study of imprinted loci, and use of** 361 **transactivators.**

362 Our experiments highlight an important technical consideration for the imprinting  
363 field, that allele-specific expression analyses must be supported with quantitative data.

364 By end-point RT-PCR followed by allele-specific restriction digest, *TetOFF*-mediated  
365 transactivation of maternally inherited *tm5.1* appears to fully reverse imprinting, with  
366 maternal-only bands upon gel electrophoresis (Figure S7). Similar data have previously  
367 been interpreted as a silencing of the paternal allele *in trans* [76]. However, sequencing  
368 of *Rasgrf1* cDNA of *tm5.1/+;TetOFF* neonatal brain demonstrated that roughly 10% of  
369 total *Rasgrf1* reads are paternal in origin, suggesting that the wild-type paternal allele  
370 continued to express *Rasgrf1* at wild-type levels, and was not silenced *in trans*.

371 Similarly, end-point analysis of *+tm5.1* animals lacking a transactivating allele  
372 revealed biallelic expression. While this could be interpreted as a possible *trans* effect of  
373 the paternally inherited *tm5.1* allele exerting effects on the maternally inherited and  
374 normally transcriptionally silent WT allele, qPCR of *Rasgrf1* in these animals  
375 demonstrated severely reduced *Rasgrf1*, suggesting instead that, in the *tm5.1* system,  
376 biallelic expression reflects minimal transcription.

377 An unexpected outcome of this work was that *TetOFF*-mediated transactivation  
378 of *tm5.1* influenced expression across the entire chromatin domain, defined by cohesin  
379 ChiA-PET [45], where the transactivator bound, and that this influence was both allele-  
380 and tissue-specific. The cohesin ChiA-PET study defined two regions of interaction,  
381 which may represent the maternal and paternal alleles. These widespread transcriptional  
382 changes were not observed in *TetON:+tm5.1* tissues (data not shown), suggesting that  
383 these widespread effects may be restricted to the *TetOFF* system. While this finding was  
384 not an objective of our study, it emphasizes the considerations that should be taken  
385 when interpreting transcriptional effects using potent transactivating systems such as the  
386 *TetOFF* protein.

387 In conclusion, our data support the existence of a second, pitRNA-independent  
388 mechanism for DNA methylation at *Rasgrf1*. We propose a *cis*-acting mechanism by  
389 which the repeat sequences themselves are largely responsible for methylation control



390 at the locus, and the pitRNA increase the probability of methylation in the paternal  
391 germline.

## 392 MATERIALS AND METHODS:

393 **Primer sequences** for all analyses are listed in Table S1.

394 **TetO vector generation:** We modified pYP1, which carries the DMR and  
395 *Rasgrf1* repeats, and 4 kb of homologous flanking sequence [77] to carry seven copies  
396 of the Tet Responsive Element (collectively termed TetO) in place of the *Rasgrf1* repeats  
397 as follows. The *Rasgrf1* repeats were removed *via* restriction digest with *Clal* and *Mlul*;  
398 sticky ends were blunted with Klenow; the plasmid backbone was gel purified and then  
399 ligated closed generating pDHT2. pDHT2 and pPX3, a vector containing the Tet  
400 Operator, were digested with *NheI*, and linearized pDHT2 was ligated to the TetO  
401 sequences, generating pDHT3, which was confirmed by Sanger sequencing. The 3'  
402 homologous arm of pDHT3 was then shortened to approximately 1kb by restriction  
403 digest with *BsrGI* and *SfiI* to generate pETC6, which was linearized with *PciI* prior to  
404 lipofection into ES cells.

405 **CRISPR/Cas9-mediated generation of TetO<sup>tg</sup>, TetO<sup>Δ</sup>tg, *Rasgrf1*<sup>tm5.0PDS</sup> and**  
406 ***Rasgrf1*<sup>tm5.1PDS</sup>:** pX330 (Addgene Plasmid # 42230) was modified to carry PDS 2195-6,  
407 a complementary primer pair coding for an sgRNA targeting the *Rasgrf1* repeats,  
408 following the Zhang lab protocol [78] to generate pX330-rep5. PDS 2195-6 was  
409 designed using the CRISPR Design Tool (<http://crispr.mit.edu:8079/>). To effect  
410 homology directed repair at the *Rasgrf1* locus, v6.5 embryonic stem cells [79] were  
411 lipofected with linearized pETC6 and pX330-rep5 with Lipofectamine 2000, following the  
412 manufacturer's protocol. Cells were allowed to recover overnight, then treated for 10  
413 days with 300 ug/mL G418 (Sigma A1720). Colonies were picked and genotyped with  
414 PCR 2359-8 and PDS 2344-2263, which generate a product only from the targeted allele

415 (*Rasgrf1*<sup>tm5.0PDS</sup>) and PDS 2757-8, an internal PCR for TetO, to detect cells harboring a  
416 randomly inserted vector that provided the transgenic (Tg) model. Targeted and  
417 transgenic status for tm5.0 and TetO<sup>Tg</sup> were further confirmed by Southern blot [21].

418 TetO<sup>Tg</sup> and *Rasgrf1*<sup>tm5.0PDS</sup> ES cells were microinjected into B6(Cg)<sup>Tyrc-2J/J</sup>  
419 blastocysts by the Cornell University Transgenics Core. 22 chimeras were recovered.  
420 Germline transmission was confirmed by diagnostic crosses to FVB/N females and PCR  
421 with PDS 2757-8. Chimeras were crossed with mice constitutively expressing FlpE  
422 recombinase (JAX Strain 003800) to generate *Rasgrf1*<sup>tm5.1PDS</sup> and TetO<sup>Tg</sup>.  
423 Recombination was confirmed by Sanger sequencing of PDS 2262-3 PCR products,  
424 which spans the neo resistance cassette and frt sites.

425 **Generation of *TetOFF* mice:** To produce mice that constitutively express the tet  
426 transactivator (*TetOFF*), mice carrying a tTA transgene preceded by a floxed neomycin-  
427 polyadenylation cassette (pA-*TetOFF*, JAX Strain No 011008) were crossed with mice  
428 constitutively expressing *Sox2-Cre* (JAX Strain No 008454). Recombination and  
429 subsequent loss of the neomycin resistance cassette was confirmed by endpoint PCR  
430 with PDS 2794-5, followed by Sanger sequencing. PDS 2794-5 sequences were  
431 supplied by Bruce Morgan [80].

432 **Induction of pitRNA: *TetOFF*:** *tm5.1* mice were crossed to *TetOFF* mice.  
433 Induction of pitRNA expression was validated in adult and neonatal tissues using PDS  
434 2266-7.

435 ***TetON*:** Female mice were injected with 0.01 mg/g body weight of 0.01 mg/mL  
436 doxycycline hyclate (Sigma D9891) intraperitoneally every 24 hours for three days as a  
437 preloading phase, then bred. Breeding pairs were fed 200 mg/kg doxycycline chow  
438 (BioServ S3888) for the duration of pregnancy. Induction of pitRNA expression was

439 validated in all tissues by endpoint and qRT-PCR using PDS 2266-7 and PDS 2916-7, a  
440 primer pair specific for pitRNA produced from the *tm5.1* allele.

441 **Allele-specific analysis of *Rasgrf1* expression:** Neonatal brains were  
442 collected at postnatal day 2; the olfactory bulbs were visually identified under dissection  
443 microscope and discarded. Other tissues were collected by gross dissection. Tissues  
444 were snap frozen in liquid nitrogen, then submerged in 1 mL Trizol. Tissues were  
445 homogenized using a Biospec Mini-Bead Beater-8 using 1 3mm steel bead in XXTuff  
446 Microvials (BioSpec XX0TX). Total RNA for all samples was processed via the Trizol  
447 protocol (Thermo Fisher Scientific 15596018). RNA was DNase treated, random primed,  
448 and reverse transcribed using Promega RQ1 DNase and RQ RTase (Promega M6101  
449 and A5003 respectively) following the manufacturer's protocol. RT-PCR was performed  
450 with PDS 245-6 (95°C 2min, 40 cycles of 95°C 30s, 60°C 30s, 72°C 30s, 72°C 7min  
451 using Promega GoTaq in a volume of 25 uL (Promega M3001). *For allele-specific*  
452 *restriction digest:* 20 uL of PCR product was digested with 2.5U *AcI*. Digestion products  
453 were separated by electrophoresis on a 4% agarose gel. *For allele-specific read*  
454 *quantification:* End-point PCR samples were submitted for sequencing in MiSeq libraries  
455 as described below in. Targeted sequencing analysis. Read quantification for *Rasgrf1*-  
456 specific expression was performed on trimmed samples with the *grep* and *wc* functions.  
457 *Grep* sequences are listed in Table S4. MGI SNP IDs and flanking sequences are listed  
458 in Table S5.

459 **qRT-PCR and heat map generation:** qRT-PCR was performed in 20 uL  
460 reactions using SYBR Green Master Mix (CAT 4367659) on a Biosystems 7500 with  
461 annealing temperature 60°C for forty cycles followed by a dissociation stage. The  
462 following primer pairs were used: PDS 2266-7 for general pitRNA expression; PDS  
463 2916-7 for TetO-pitRNA expression; PDS 2877-8 for *Rasgrf1* expression; PDS 72-3 for

464 *Rpl32* expression; PDS 2719-8 for *ATOHe* expression; PDS 3211-2 for *Ctsh* expression;  
465 PDS 2178-9 for *Ankrd34c* expression. Heat maps were generated in R [81].

466 **Gonocyte collection:** Females were checked for plugs, weighed to confirm  
467 pregnancy, and sacrificed at gestational day 16.5. Gonocytes from male embryos were  
468 collected as in Watanabe *et al*, 2011 [24] with some modifications. Briefly, embryonic  
469 testes were collected and incubated in 50 uL 0.25% trypsin for 10 minutes. Samples  
470 were then triturated and visually inspected for tissue disaggregation. Incubation and  
471 trituration were repeated up to two times until full disaggregation was achieved; any  
472 remaining clumps were manually removed. Samples were then transferred to McCoy's  
473 basic medium supplemented with FBS and pre-plated for 1.5 hours. Suspended germ  
474 cells were harvested, pelleted at 300 x *g* for 8 minutes, then processed for RNA and  
475 DNA. We validated the purity of gonocytes by bisulfite sequencing of *Igf2r*, which is  
476 expected to be extensively hypomethylated in the male germline [**Error! Bookmark not**  
477 **defined.**].

478 **Oocyte collection:** 28 to 42 day old females were superovulated with 5 IU  
479 human chorionic gonadotropin (Millipore 367222) followed by pregnant mare serum  
480 gonadotropin (Millipore 230734) 48 hours later. Oocytes were collected the next morning  
481 via standard methods [82] and processed for total RNA via Trizol. Oocyte recovery was  
482 evaluated using RT-PCR primers for *Zp3* (PDS 2212-3).

483 **Genomic DNA extraction from tails and cells:** All DNA was collected via  
484 overnight incubation at 55°C in Laird's Lysis Buffer [83] and 20 ug/mL Proteinase K  
485 followed by isopropanol precipitation and resuspension in TE. Scant gDNA samples,  
486 such as those from gonocytes, were co-precipitated with 20 ug glycogen (Thermo Fisher  
487 R0551) and spun at 20,817 x *g* for 15 minutes.

488 **DNA extraction from sperm:** The caudal epididymis and vas deferens of adult  
489 male mice were harvested and placed in PBS for 1 hr at 37°C. Large tissue chunks were

490 manually removed and the remaining sperm were pelleted at 400 x g for 12 minutes at  
491 4°C. Supernatant was discarded; the pellet was resuspended in the remaining  
492 supernatant and incubated with 1 mL somatic cell lysis buffer [84] for 1 hr on ice. Lysed  
493 samples were spun at 20,817 x g for 3 minutes at 4°C and the supernatant was  
494 discarded. The sperm pellet was resuspended in remaining supernatant; 2 uL was mixed  
495 with Trypan Blue and examined microscopically for remaining somatic contamination.  
496 The remaining suspension was mixed with 500 uL Buffer RLT (Qiagen 79216) and 150  
497 mM DTT, then homogenized with 2 2mm steel beads following the protocol of Wu *et al*  
498 [85]. DNA extraction then proceeded as described above.

499 **Bisulfite conversion, BS-PCR, and COBRA:** Bisulfite conversion was  
500 performed using the Zymo Research EZ DNA Methylation-Lightning Kit (Zymo Research  
501 D5031). BS-PCR was performed with PDS 271-272 for the wild-type DMR, PDS 272-  
502 2627 for the *tm5.1* or Tg DMR, PDS 2934-5 for the *Igf2r* DMR, and 271-287 for the *tm1*  
503 DMR using NEB Epimark HotStart *Taq* DNA Polymerase (NEB M0590) following the  
504 following cycling parameters: 95°C for 30s, 40X (95°C 15s, 55°C 30s, 68°C 30s) with the  
505 exception of PDS 271-287, where the annealing temperature used was 58°C. COBRA  
506 was performed with primers PDS 271-272 after bisulfite treatment via direction addition  
507 of 5U of *Bst*UI and digestion at 60°C for 1 hour, followed by electrophoresis on a 4%  
508 agarose gel. In this assay, digestion products arise from methylated DNA; unmethylated  
509 DNA resists digestion.

510 **Targeted sequencing analysis:** PCR products were pooled, column cleaned  
511 with the BioBasic EZ-10 DNA Columns (BioBasic BS427), eluted in 30 uL of Tris-HCl pH  
512 8.0, and quantified via Nanodrop. NEBNext Universal Adaptors were ligated using T4  
513 DNA Ligase in Quick Ligase Buffer in a total volume of 22 uL at 25°C for 15 minutes.  
514 Self-ligated adaptors (adaptor dimer) was excluded with a 0.8X (2.55 uL) Agencourt  
515 AMPure XP bead cleanup (Beckman Coulter A63880) followed by 1X PEG-NaCl buffer

516 (25% PEG, 2.5 M NaCl in DEPC water) cleanup to exclude self-ligated adaptors.  
517 Barcodes were added via PCR amplification for 20 cycles with Phusion HF (NEB  
518 M0530L) using NEBNext Multiplex Oligos for Illumina® (NEB E7335). Adaptor dimer  
519 was again excluded via 0.8X AMPure bead cleanup followed by a 1X PEG Buffer-NaCl  
520 cleanup using the same beads. Libraries were quantified using Qubit, and sequenced on  
521 a MiSeq 2000 Paired End 2 x 250bp at the Cornell University Genomics Core. Samples  
522 were evaluated for quality and trimmed to 200bp with Trim Galore!  
523 ([www.bioinformatics.babraham.ac.uk](http://www.bioinformatics.babraham.ac.uk)). Trimmed samples were probed for WT, *tm5.1*, or  
524 Igf2r DMR-specific sequences using the grep function; these reads were compiled into  
525 separate files and analyzed using QUMA [86]. Animals with a minimum of ten reads  
526 were included for analysis. Total reads per amplicon per sample are listed in Table S2.  
527 Grep sequences and reference sequences for QUMA are listed in Table S3.

#### 528 **AUTHORS' CONTRIBUTIONS:**

529 ETC, DHT, and PDS designed experiments. ETC, MH, and DHT performed  
530 experiments. ETC and PDS wrote the manuscript. All authors read and approved the  
531 final manuscript.

#### 532 **ACKNOWLEDGEMENTS:**

533 We thank Roman Spektor for critical contributions to the design, collection, and reporting  
534 of these data. We thank Maria Garcia-Garcia for generous donation of *Sox2-Cre* mice.  
535 We thank Bruce Morgan for providing the primer sequences for PDS 2794-5, which were  
536 used to genotype the *pA-TetOFF* and *TetOFF* alleles.

#### 537 **COMPETING INTERESTS:**

538 The authors have declared that no competing interests exist.

539 **ETHICAL APPROVAL AND CONSENT TO PARTICIPATE:**

540 All animal studies were approved by the Institutional Animal Care and Use Committee  
541 protocol 2002-0075. No studies included human subjects.

542 **FUNDING:**

543 Funding for this study was from the National Institutes of Health (RO1 GM10523 to PDS.  
544 ETC was supported by T32 ODO011000; DHT was supported by T32 HD057854. The  
545 content is solely the responsibility of the authors and does not necessarily represent the  
546 official views of the National Center for Research Resources or the National Institutes of  
547 Health. The funders had no role in study design, data collection and analysis, decision  
548 to publish, or preparation of the manuscript.

549 **FIGURE LEGENDS:**

550 **FIGURE 1. Schematics and pitRNA expression of the wild-type *Rasgrf1* and**  
551 ***Rasgrf1*<sup>tm5.1PDS</sup> alleles. a)** Schematics of the wild-type *Rasgrf1* and *Rasgrf1*<sup>tm5.1PDS</sup>  
552 alleles. Green box represents the *Rasgrf1* differentially methylated region (DMR). The  
553 Imprinting Control Region (ICR) lies 30 kb upstream of *Rasgrf1* coding sequence (purple  
554 box), and includes the DMR and the 1.6kbp *Rasgrf1* repeats (yellow triangles). Grey  
555 blocks denote 5' and 3' homologous arms of the targeting vector pETC6, described in  
556 Methods. Orange triangle downstream of *Rasgrf1*<sup>tm5.1PDS</sup> is a residual frt site. Figures are  
557 not drawn to scale. **b)** pitRNA expression postnatal day 1 testes of wild-type,  
558 *tm5.1/tm5.1*, and *TetOFF:tm5.1/tm5.1* animals. *TetOFF* transactivates *tm5.1* to  
559 physiological levels; *tm5.1* homozygotes express undetectable levels of pitRNA in the

560 absence of *TetOFF*. Error bars represent standard error across biological triplicates. \*\*\*,  
561  $p < 10^{-6}$ ; n.s., not significant; n.d., not detected at 40 cycles.

562 **FIGURE 2. Induction of pitRNA in the male germline does not impart methylation**  
563 ***in cis*, at the *tm5.1* DMR, or *in trans*, at the *Rasgrf1* DMR.** DNAs were collected from  
564 gonocyte and somatic fractions of male embryos (a-d) and mature sperm from adult  
565 males (e). The somatic and germline fractions of one male is shown in each panel a-d;  
566 panel e shows bisulfite analysis of the sperm of two males (#1 and #2). Animals were on  
567 the C57BL/6 or FVB/n (FVB, c, d) backgrounds. Mothers were fed chow containing (+  
568 dox), or lacking (– dox) doxycycline between mating and birth. Bisulfite PCR was done  
569 using PCR primers specific to the *tm5.1* DMR or, as controls, the DMRs from wildtype  
570 (WT) *Rasgrf1* and *Igf2r*. WT and *Igf2r* are respectively expected to be hyper- and  
571 hypomethylated in male gonocytes; *Igf2r* is expected to be 50% methylated in soma.  
572 Number of CpG dinucleotides assayed from *tm5.1*, WT, *tm5.1* and *Igf2r* totaled 15, 17,  
573 and 12 respectively. MiSeq libraries prepared from PCR products were sequenced to a  
574 minimum of 12 reads per sample for the two *Rasgrf1* alleles (range: 12-28,067; median:  
575 135). Data are reported as the percentage of reads showing the methylation levels  
576 indicated in the Bisulfite Key at lower right. *Igf2r* hypomethylation in the gonocyte  
577 fractions of each sample indicate minimal somatic contamination. Consistent  
578 hypomethylation of the *tm5.1* allele in each pedigree and sample indicates pitRNA  
579 expression in the absence of the repeats is insufficient for DMR methylation.

580 **FIGURE 3: *TetOFF*-mediated transactivation does not affect *tm5.1* DMR methylation in**  
581 **neonatal tail. a) Targeted bisulfite analysis of WT and *tm5.1* DMRs in neonatal tail**  
582 **gDNA; pedigree shown at top. *tm5.1* is hypomethylated regardless of parental descent**  
583 **and presence of *TetOFF*. The WT DMR is methylated depending on parent of origin—if**



584 inherited maternally, the wildtype DMR is hypomethylated; if inherited paternally, the  
585 wildtype DMR is hypermethylated. Two biological replicates for all genotypes are shown  
586 (#1 and #2) except for the *TetOFF:tm5.1/+* genotype, where one animal is shown. **b)**  
587 Targeted bisulfite analysis of *tm5.1/+*, *tm5.1/TetON*, and *TetON/tm5.1* neonatal tail gDNA.  
588 In all genotypes, *tm5.1* DMR is hypomethylated; as expected, the wild-type DMR is  
589 methylated if inherited paternally as in *tm5.1* and *tm5.1/TetON* animals and  
590 hypomethylated if inherited maternally as in *TetON/tm5.1* animals. Reads for two  
591 animals (#1 and #2) per genotype are shown. \*\*,  $p < 10^{-3}$ ; \*\*\*,  $p < 10^{-6}$ ; n.s., not  
592 significant.

593 **FIGURE 4. Transactivation of *tm5.1* upregulates *Rasgrf1* expression from *tm5.1* in**  
594 **neonatal brain. a and d) Pedigrees of animals used respectively for b, c), and e, f). b,**  
595 **e) *Rasgrf1* expression levels were assayed by qRT-PCR using neonatal brains from the**  
596 **pedigrees, and genotypes shown directly above in a and d). Error bars represent**  
597 **standard error from, at minimum, biological triplicates. *Rasgrf1* levels were normalized to**  
598 ***Rpl32*, and levels in WT mice were arbitrarily set at 1. c and f) Relative expression of**  
599 ***Rasgrf1* from the two parental alleles (maternal pink; paternal, blue). Allelic assignments**  
600 **were made by sequencing libraries of RT-PCR products amplified using primers that**  
601 **span *Rasgrf1* polymorphisms, which distinguish *tm5.1*, made on the 129S4 background,**  
602 **and the WT allele, contributed by *TetOFF* or *TetON* mice on the C57Bl/6 background.**  
603 **Products were sequenced to a minimum of 15 reads per animal from at least two**  
604 **biological replicates. *Rasgrf1* is dramatically downregulated in *+tm5.1* animals, that**  
605 **inherit *tm5.1* paternally, with most residual expression coming from the largely silent**  
606 **maternal allele. The *tm5.1* allele increases *Rasgrf1* expression in a *Tet* transactivator-**  
607 **dependent manner, regardless of the parental origin of *tm5.1*. No doxycycline treatments**

608 were applied for **c** and **d**), but were applied for **e** and **f**). \*,  $p < 0.05$ ; \*\*,  $p < 0.01$ ; \*\*\*,  $p <$   
609  $10^{-6}$ .

610 **FIGURE 5. Regional transcription is perturbed in *TetOFF: +/5.1* and *TetOFF: 5.1/+***  
611 **brain and testes. a)** Two regions of chromatin interactions (black bars) are annotated at  
612 the *Rasgrf1* locus as predicted by cathepsin ChiA-PET in mouse embryonic stem cells  
613 [45]; locations are shown relative to the genes indicated below in **b**). Lengths of each  
614 predicted interaction are shown in kilobases (kb) within each bar. Relative log<sub>2</sub>  
615 expression levels in neonatal brain **b**), and neonatal testes **c**) of transcripts from  
616 chr9:89,60,000-90,100,000 are shown, displayed left to right as they are located 5' to 3'.  
617 In brain, *TetOFF* exerts dramatic upregulation of *Rasgrf1* and nearby transcripts  
618 *AK015891*, *AK029869*, and an annotated ATOH1 binding site 3' of the *Rasgrf1* repeats  
619 (*ATOHe*) in mice with both paternally and maternally inherited *tm5.1*. However, distant  
620 transcripts *Tmed3* and *Ctsh* are downregulated modestly in brains of offspring inheriting  
621 *tm5.1* maternally. **c)** Log<sub>10</sub> expression of four transcripts (a subset of the nine assayed  
622 in brain) in neonatal testes. While *ATOHe* and *Ctsh* are upregulated when *tm5.1* is  
623 transactivated and paternally inherited, *Ankrd34c*, *ATOHe*, and *Ctsh* are downregulated  
624 when *tm5.1* is transactivated and inherited maternally. All expression data are relative to  
625 Rpl32. **Color Key** at lower right. \*,  $p < 0.05$ ; \*\*,  $p < 0.01$ ; \*\*\*,  $p < 10^{-6}$ .

626 **FIGURE 6. Working model for regulation of methylation at *Rasgrf1* in the male**  
627 **embryonic germline and neonatal brain.** For neonatal brain, only the paternal allele is  
628 depicted. **a)** At the wildtype *Rasgrf1* DMR, the *Rasgrf1* repeats (yellow triangles) drive  
629 expression of the pitRNA antisense to the DMR (transcription depicted by green arrow)  
630 and increase the likelihood that the DMR is hypermethylated (filled lollipops), likely by  
631 Dnmt3c, in the male germline. **b)** *Rasgrf1*<sup>tm1<sup>PDS</sup></sup> (*tm1*) lacks the *Rasgrf1* repeats (open

632 brackets). pitRNA is not expressed and methylation is not established at the DMR in the  
633 germline (open lollipops). **c)** *Rasgrf1*<sup>tm5.1PDS</sup> (*tm5.1*) is not methylated in the male  
634 germline. **d)** *Rasgrf1*<sup>tm5.1PDS</sup> transactivation with *TetOFF* (orange half circle labelled TA)  
635 induces pitRNA expression but does not impart methylation to the *tm5.1* DMR. **e)** In  
636 neonatal brain, *Rasgrf1* is paternally methylated and expressed. **f, g)** *tm1* and *tm5.1*  
637 brains have severely decreased *Rasgrf1* expression. **h)** transactivation of *tm5.1* causes  
638 strong upregulation of *Rasgrf1* but the *tm5.1* DMR remains hypomethylated. **Outset:**  
639 *TetOFF*-mediated transactivation of *tm5.1* affects nearby transcription differentially  
640 depending on parental inheritance (blue and pink lines). Upregulated and downregulated  
641 genes are depicted by red and blue boxes respectively; unchanged genes are depicted  
642 in gray. TetO and DMR are indicated by the pink and green boxes respectively; *TetOFF*  
643 binding is indicated by the orange half circle.

#### 644 SUPPORTING INFORMATION CAPTIONS:

645 **Figure S1. Validation of *Rasgrf1*<sup>tm5.1PDS</sup>.** **a)** Generation of *Rasgrf1*<sup>tm5.1PDS</sup> from  
646 *Rasgrf1*<sup>tm5.0PDS</sup>. *Rasgrf1*<sup>tm5.0PDS</sup> (**a**, upper schematic) was generated via CRISPR-Cas9-  
647 mediated homology-directed repair in v6.5 embryonic stem cells. Targeting was  
648 confirmed by Sanger sequencing of PCR products generated with primers PDS 2359-8  
649 and PDS 2344-2263, which respectively span the junctions of the 5' and 3' homologous  
650 arms of the pETC6 vector (grey boxes), and the flanking sequences of the  
651 *Rasgrf1*<sup>tm5.0PDS</sup> allele. PDS 2344 falls within the neo resistance cassette (n). PDS 2358  
652 sequence falls partially within TetO. DNAs from Wild-type (WT) animals show no product  
653 for either PDS 2359-8 or PDS 2344-2263. *Rasgrf1*<sup>tm5.1PDS</sup> (*tm5.1*, **a**, lower schematic)  
654 was generated by crossing *Rasgrf1*<sup>tm5.0PDS</sup> males to females constitutively expressing

655 FlpE recombinase (FlpE). Recombination was confirmed with Sanger sequencing of  
656 PCR products generated with primers PDS 2262-2263. PDS 2262 maps to TetO  
657 sequence, and the product contains the single residual frt site (orange triangle)  
658 remaining after recombination. PCR products shown below the amplicon schematics  
659 arise only when using DNAs from mutant animals. **b)** Schematic for Southern blot shown  
660 in **c)**; probe location, shown with pink line, is outside of the targeting vector; location of  
661 *PstI* sites are indicated. Yellow triangles indicate the *Rasgrf1* repeats. Homologous arms  
662 are omitted for clarity. **c)** Southern blot of a *tm5.1* heterozygote vs. a wild-type animal  
663 and a *Rasgrf1*<sup>*tm1*</sup> homozygote (*tm1*); in these animals, the probe detects the same 3kb  
664 fragment in *tm1* as is *tm5.1*. **d)** Copy number qPCR support targeting of the endogenous  
665 allele: *tm5.1* heterozygotes have half the copy number of the repeat element as WT  
666 animals, but the same number of DMR sequences. Error bars represent standard error  
667 across biological duplicates.

668 **Figure S2. The *tm5.1* allele lacks imprinted methylation and expression in the**  
669 **absence of transactivator.** Summary of *Rasgrf1* expression, *Rasgrf1* imprinting, and  
670 total animals measured in *tm5.1* animals of the **a)** N2 and **b)** N3 generations. The  
671 majority of animals inheriting *tm5.1* paternally (+/*tm5.1*) expressed *Rasgrf1* biallelically  
672 as assayed by endpoint PCR, but levels were only 2% those seen in wild-type (WT)  
673 mice, and the alleles were unmethylated. However, a subset of +/*tm5.1* animals (4 of 10  
674 in the N2, and 2 of 15 in the N3 generation) expressed *Rasgrf1* at WT levels from the  
675 paternal *tm5.1* allele. N3 animals expressing *Rasgrf1* paternally and at wild-type levels  
676 did not arise from methylated fathers, indicating that sporadic *tm5.1* DMR methylation,  
677 and *Rasgrf1* expression was not an inherited state. This is consistent with findings with  
678 the *Rasgrf1*<sup>*tm1PDS*</sup> allele which lacks the *Rasgrf1* repeats [21]. **c)** Allele-specific  
679 expression analysis. A male chimera prepared using C57BL/6 blastocysts, and v6.5 ES

680 cells with the *tm5.1* allele on the 129S4 (129) background, was crossed with C57BL/6  
681 females. Neonatal brain cDNA was subjected to endpoint RT-PCR using primers  
682 spanning SNPs from the 129 and C57BL/6 backgrounds that harbor distinct *AcI* sites.  
683 Product digestion with *AcI* produces allele-specific bands, reporting the expressed  
684 allele(s). The slowest and fastest migrating bands represent the 129 paternal *Tm5.1*  
685 allele; the two middle bands represent the C57BL/6 allele. WT animals, inheriting the  
686 C57BL/6 paternal allele, expressed *Rasgrf1* solely from the WT C57BL/6 allele(s). A  
687 portion of *+tm5.1* animals express paternally from the *tm5.1* 129 allele. The majority  
688 express biallelically from the maternal C57BL/6 and paternal 129 alleles. **d)** qRT-PCR of  
689 *Rasgrf1* in wild-type, and *+tm5.1* animals. Paternally expressing *+tm5.1* animals express  
690 *Rasgrf1* at WT levels, whereas biallelically expressing *+tm5.1* animals express at 2% of  
691 WT, indicating biallelic expression detected in *tm5.1* by endpoint PCR was seen when  
692 the normally active paternal allele was silent. Error bars represent standard error across  
693 at least biological triplicate. **e)** Targeted bisulfite sequencing (bar graphs) and COBRA  
694 analyses (gel images) of the WT DMR in tail gDNA of WT animals (left), and the *tm5.1*  
695 DMR of *+tm5.1* animals with paternal (middle) and biallelic (right) *Rasgrf1* expression.  
696 Animals with paternal expression were methylated at the *tm5.1* DMR, whereas animals  
697 with biallelic expression were hypomethylated. WT animals have two copies of the WT  
698 *Rasgrf1* DMR, one hypermethylated and one hypomethylated. As such, bisulfite analysis  
699 of the WT DMR in soma is 50%. Bar graphs report the percentage of total reads with the  
700 levels of methylation shown in the key on the right. COBRA queries methylation at five  
701 *Bst*UI sites in both the WT and the *tm5.1* DMRs. “+” and “-” denote addition or lack of  
702 *Bst*UI. Methylated (+mC) and unmethylated -mC) sites are respectively sensitive or  
703 resistant to *Bst*UI digestion. Digestion products are indicated by black arrowheads. The  
704 PCR product of the WT DMR shows partial digestion, reporting the different methylation  
705 states of the two parental alleles; paternally expressing *+tm5.1* show full digestion of the

706 *tm5.1* DMR; biallelically expressing *+/tm5.1* animals show no digestion. **f)** *+/tm5.1*  
707 animals are lower in body weight compared to their WT littermates at several ages post-  
708 weaning, consistent with previous findings that loss of paternal methylation and  
709 expression at *Rasgrf1* leads to diminished body weight [41]; four to ten mice per  
710 genotype at each age were measured.

711 **Figure S3. Generation of the *TetOFF* allele.** *pA-TetOFF* males were crossed with  
712 females carrying a *Sox2-Cre* transgene to generate the recombined *TetOFF* allele. PDS  
713 2794 maps to the splice acceptor site of the ROSA26 locus; PDS 2795 maps 3' of the  
714 *TetOFF* coding sequence, within wild-type ROSA26 sequence. *pA-TetOFF* animals  
715 produce a 2.2kb PCR product with PDS 2794-5, whereas *TetOFF* animals produce a  
716 1.5kb PCR product due to loss of the floxed Neo-polyA cassette. Note that a portion of  
717 animals are mosaic for *pA-TetOFF* and *TetOFF* (mosaic); though only fully recombined  
718 mice bearing the *TetOFF* allele were analyzed in crosses with the *tm5.1* allele.

719 **Figure S4. Successful pitRNA induction in *TetON/tm5.1* and *TetOFF/tm5.1* several**  
720 **tissues. a)** Endpoint RT-PCR for pitRNA in the tissues of transactivated *tm5.1* 28 to 42  
721 day old animals demonstrate induction of pitRNA in several tissues of *TetON: +/tm5.1*  
722 and *TetOFF: +/tm5.1* mice. Low signals from testes are likely due to the blood testes  
723 barrier restriction entry of doxycycline (dox) in adult males. pitRNA is not detectable by  
724 endpoint PCR in wild-type (WT) animals. **b)** qPCR for pitRNA in adult liver shows 10-fold  
725 upregulation of pitRNA in *TetON/tm5.1* animals fed dox chow, and 500-fold upregulation  
726 of pitRNA in *TetOFF/tm5.1* livers relative to WT. **c)** qPCR for pitRNA in neonatal brain  
727 shows nearly 10,000 fold upregulation of pitRNA in *TetOFF/tm5.1* brains relative to WT,  
728 *TetOFF/+*, and *+/tm5.1* animals. \*\*\*,  $p < 10^{-6}$ ; n.s., not significant.

729 **Figure S5. Additional bisulfite analysis of embryonic and adult male germline. a)**  
730 COBRA of the *tm5.1* DMR for the *TetOFF/tm5.1* animal depicted in **Fig 2a** (#1) as well  
731 as a littermate of the same genotype (#2). “+” and “-” designate addition of *Bst*UI. The  
732 *tm5.1* DMR is hypomethylated in the gonocyte and somatic fractions of both animals.  
733 Targeted bisulfite sequencing for #2 is shown below. The paternally inherited wild-type  
734 (WT) DMR is hypermethylated in both gonocyte and somatic fractions; the *tm5.1* DMR is  
735 hypomethylated in both gonocyte and somatic fractions. The *Igf2r* DMR is  
736 hypomethylated in gonocyte and 50% methylated in soma. **b)** COBRA for the *tm5.1*  
737 DMR for the *TetON/tm5.1* + dox animal depicted in **Fig 2c** (#1) as well as a littermate of  
738 the same genotype (#2). Bisulfite sequencing results for #2 are depicted below. Note  
739 that while the *tm5.1* DMR is hypomethylated in the gonocyte and somatic fractions of #1,  
740 it is approximately 50% methylated in #2 by bisulfite sequencing and COBRA. This is  
741 consistent with rates of stochastic *tm5.1* DMR methylation as previously described: As  
742 described in **Fig S2**, 10-25% of *+tm5.1* show evidence of *tm5.1* methylation and  
743 expression in the soma. Rep #2 is one of six assayed (18%) transactivated *tm5.1*  
744 embryonic gonads to display partial methylation of the *tm5.1* DMR in the gonocyte and  
745 somatic fraction. **c)** COBRA for the two *+tm5.1* and two *TetOFF/tm5.1* animals shown in  
746 **Fig 2e** (#1 and #2 of each genotype). COBRA results for an additional three *+tm5.1*  
747 animals (#3, #4, #5) are shown; bisulfite results for #3 are below. COBRA from an  
748 additional *TetOFF/tm5.1* animal (#3) is also shown. In all samples, the *tm5.1* DMR is  
749 hypomethylated. **Bisulfite Key** at lower right.

750 **Figure S6. Transactivation of *tm5.1* with *TetON* and doxycycline induces**  
751 **expression of *Rasgrf1* from the *tm5.1* allele, but does not impart methylation to the**  
752 ***tm5.1* DMR or affect expression or methylation of the WT allele. a)** *AcI* digestion of  
753 PDS 245-6 endpoint RT-PCR product in the offspring of a *TetON* x *tm5.1* cross. *TetON*:



754 *+/tm5.1* animal express from the paternal *tm5.1* (129) allele, whereas WT and *TetON: +/+*  
755 animals express from the paternal WT (C57BL/6) allele, and *+/tm5.1* animals express  
756 weakly and biallelically. **b)** *AcI* digestion of PDS 245-6 endpoint RT-PCR product in the  
757 offspring of a *tm5.1* x *TetON* cross. *TetON: tm5.1/+* animals express *Rasgrf1* biallelically,  
758 indicating activation of the maternal *tm5.1* allele in addition to the normally active  
759 paternal WT allele. *tm5.1/+*, *TetON: +/+* and WT animals express paternally from the WT  
760 allele. **c)** COBRA for the *tm5.1* and WT DMRs in tail DNA of *TetOFF: +/tm5.1* and  
761 *TetOFF: tm5.1/+* animals. The *tm5.1* DMR is hypomethylated regardless of parental  
762 origin. The WT DMR is unmethylated if inherited maternally (animal at left) but fully  
763 methylated, as evidenced by complete digestion of PCR products, if inherited paternally  
764 (animal at right).

765 **Figure S7. Oocyte preloading of pitRNA to 90X wildtype levels has no effect on**  
766 ***Rasgrf1* expression in wild-type offspring.** **a)** pitRNA levels in oocytes after induction  
767 in *TetON: +/tm5.1* females treated with doxycycline. Error bars represent standard error  
768 across biological duplicates **b)** RT-PCR for *Zp3*, an oocyte-specific transcript, was used  
769 to confirm isolation of oocytes. **c)** The pedigree shown was used to determine if oocyte  
770 loading of pitRNA could produce intergenerational activation of the maternal *Rasgrf1*  
771 allele. pitRNA was induced in oocytes of a *TetON: +/tm5.1* female by IP injection of  
772 doxycycline for three days prior to mating; doxycycline-containing chow was provided  
773 throughout pregnancy. Activation of the maternal allele in neonatal brains of offspring  
774 was used to report intergenerational effects, with allele-specific expression assayed by  
775 *AcI* digestion of RT-PCR products. All mice tested expressed only the paternal allele. **d)**  
776 *Rasgrf1* levels in brains of animals depicted directly above in c). Error bars represent  
777 standard error across biological duplicates at minimum. **e)** COBRA of the wild-type allele  
778 in WT, *TetON: +/+*, and *tm5.1/+* tails from three representative animals from d) (purple



779 trapezoids). The WT DMR is partially methylated in WT and *TetON*: +/+ animals (having  
780 inherited two WT DMRs), and fully methylated in the *tm5.1*+ animal (having inherited the  
781 WT DMR paternally); the *tm5.1* DMR is hypomethylated in this animal. Pale horizontal  
782 bar in the top third of each panel represents the dye front. \*\*  $p < 0.01$ ; n.s., not  
783 significant; IP, intraperitoneal.

784 **Table S1. Primer sequences for all analyses described.** All qPCR primers are  
785 between 87 and 113% efficient. Unless otherwise noted, all endpoint PCRs were  
786 performed using Promega GoTaq in 25 uL reactions,  $T_a = 60C$ ,  $t_e = 30s$  for 35 cycles.  
787 All qPCRs are performed in 20 uL reactions using SYBR Green Master Mix (ABI  
788 4367659) on a Biosystems 7500 with annealing temperature  $60^{\circ}C$  for forty cycles  
789 followed by a dissociation stage.

790 **Table S2. Total reads per DMR by Sample ID.** Amplicons for which less than ten reads  
791 were recovered were excluded from analysis. Total number of reads correlates in part to  
792 total amplicons for each barcode (variable). n.a., not applicable; n.m., not measured.

793 **Table S3. Sequences used for QUMA.** In preparation for analysis, raw files were  
794 probed for reads containing amplicon-specific sequences using the grep function in  
795 Linux. QUMA was performed on these reads.

796 **Table S4. Total reads broken down by C57 and FVB fractions for MiSeq**  
797 **sequencing of PDS 245-6 RT-PCR product in neonatal brain.** The *tm5.1* allele was  
798 generated on a 129 background; *Rasgrf1* expressed from the *tm5.1* allele carries 129  
799 SNPs. *TetON* and *TetOFF* are carried on a C57Bl/6 (B6) background; "+" always  
800 designates a B6 allele. A B6 x FVB gDNA sample is sequenced as a control. n.i., not  
801 included in paper.

802 **Table S5. SNP IDs and grep sequences for allele-specific PDS 245-6 digestion and**  
803 **sequencing.** SNPs were probed for using the grep function and quantified using the wc  
804 function in Linux.

## 805 REFERENCES

---

1 Okano M, Bell DW, Haber DA, and Li E. DNA Methyltransferases Dnmt3a and Dnmt3b Are Essential for De Novo Methylation and Mammalian Development. *Cell* 1999, 99: 247-257.

2 Kato Y, Kaneda M, Hata K, Kumaki K, Hisano M, Kohara Y, et al. Role of the Dnmt3 family in de novo methylation of imprinted and repetitive sequences during male germ cell development in the mouse. *Human Molecular Genetics* 2007, 16(19): 2272-80.

3 Bourc'his D, Xu GL, Lin CS, Bollman B, and Bestor TH. Dnmt3L and the establishment of maternal genomic imprints. *Science* 2001 294(5551): 2536-9.

4 Barau J, Teissandier A, Zamudio N, Roy S, Nalesso V, Herault Y, et al. The DNA methyltransferase DNMT3C protects male germ cells from transposon activity. *Science* 354(6314): 909-912.

5 Jain D, Meydan C, Lange J, Bouuaert CC, Mason CE, Anderson K, et al. *rahu* is a mutant allele of Dnmt3c, encoding a DNA methyltransferase homolog required for meiosis and transposon repression in the mouse male germline. *bioRxiv* 2017, <https://doi.org/10.1101/121822>.

6 Li E, Bestor TH, and Jaenisch R. Targeted mutation of the DNA methyltransferase gene results in embryonic lethality. *Cell* 1992, 69: 915-926

7 Howell CY, Bestor TH, Ding F, Latham KE, Mertineit C, Trasler JM, and Chaillet JR. Genomic imprinting disrupted by a maternal effect mutation in the Dnmt1 gene. *Cell* 2001, 104(6):829-38.

8 Nakamura T, Arai Y, Umehara H, Masuhara M, Kimura T, Taniguchi H, et al. PGC7/Stella protects against DNA demethylation in early embryogenesis. *Nature Cell Biology* 2006, 9, 64 – 71.

9 Payer B, Saitou M, Baron SC, Thresher R, Dixon JP, Zahn D, Colledge WH, et al. *Curr Biol* 2003, 13(23):2110-7.

10 Quenneville S, Verde G, Corsinotti A, Kapopoulou A, Jakobsson J, Offner S, et al. In embryonic stem cells, ZFP57/KAP1 recognize a methylated hexanucleotide to affect chromatin and DNA methylation of imprinting control regions. *Mol Cell* 2011 Nov 4;44(3):361-72. doi: 10.1016/j.molcel.2011.08.032

- 
- 11 Shibata M, Blauvelt KE, Liem KF, García-García MJ. TRIM28 is required by the mouse KRAB domain protein ZFP568 to control convergent extension and morphogenesis of extra-embryonic tissues. *Development* 2011, 138(24):5333-5343. doi:10.1242/dev.072546.
- 12 Ito S, Shen L, Dai Q, Wu SC, Collins LB, Swenberg J, He C, et al. Tet Proteins Can Convert 5-Methylcytosine to 5-Formylcytosine and 5-Carboxylcytosine. *Science* 2011, 333(6047): 1300-1303.
- 13 Cortellino S, Xu J, Sannai M, Moore R, Carette E, Cigliano A, et al. Thymine DNA Glycosylase Is Essential for Active DNA Demethylation by Linked Deamination-Base Excision Repair. *Cell* 2011, 146(1): 67-79.
- 14 Popp C, Dean W, Feng S, Cokus SJ, Andrews S, Pellegrini M, et al. Genome-wide erasure of DNA methylation in mouse primordial germ cells is affected by AID deficiency. *Nature* 2010, 63: 1101-1105.
- 15 Bhutani N, Brady JJ, Damian M, Sacco A, Corbel SY, and Blau HM. Reprogramming towards pluripotency requires AID-dependent DNA demethylation. *Nature* 2010,463(7284): 1042-1047.
- 16 Chotalia M, Smallwod SA, Ruf N, Dawson C, Lucifero D, Frontera M, et al. Transcription is required for establishment of germline methylation marks at imprinted genes. *Genes and Development* 2008, 23: 105-117.
- 17 Frohlich LF, Mrakovcic M, Steinborn R, Chung U, Bastepe M, and Juppner H. Targeted deletion of the Nesp55 DMR defines another Gnas imprinting control region and provides a mouse model of autosomal dominant PHP-1b. *PNAS* 2010, 107(20): 9275-9280.
- 18 Kantor B, Kaufman Y, Makedonski K, Razin A, and Shemer R. Establishing the epigenetic status of the Prader–Willi/Angelman imprinting center in the gametes and embryo. *Human Molecular Genetics* 2004, 12(22): 2767-2779.
- 19 Pant V, Mariano P, Kanduri C, Mattsson A, Lobanenkov V, Heuchel R, and Ohlsson R. The nucleotides responsible for the direct physical contact between the chromatin insulator protein CTCF and the H19 imprinting control region manifest parent of origin-specific long-distance insulation and methylation-free domains. *Genes and Development* 2003, 17: 586-90.
- 20 Pant V, Kurkuti S, Pugacheva E, Shamsuddin S, Mariano P, Renkawitz R, et al. Mutation of a single CTCF target site within the H19 imprinting control region leads to loss of Igf2 imprinting and complex patterns of *de novo* methylation upon maternal inheritance. *Mol Cell Biol* 2004, 24(8): 3497-504.
- 21 Yoon BJ, Herman H, Sikora A, Smith LT, Plass C, and Soloway PD. Regulation of DNA methylation at Rasgrf1. *Nature Genetics* 2002, 30(1): 92-6.

- 
- 22 Lindroth AM, Park YJ, McLean CM, Dokshin GA, Parker JM, Pasini D, et al. Antagonism between DNA and H3K27 Methylation at the Imprinted Rasgrf1 Locus. *PLoS Genetics* 2008, 4(8): e1000145. <https://doi.org/10.1371/journal.pgen.1000145>.
- 23 Holmes R, Chang Y, and Soloway PD. Timing and sequence requirements defined for embryonic maintenance of imprinted DNA methylation at Rasgrf1. *Molecular and Cell Biology* 2006, 26(24):9564-70.
- 24 Watanabe T, Tomizawa S, Mitsuya K, Totoki Y, Yamamoto Y, Kuramochi-Miyagawa S, et al. Role for piRNAs and noncoding RNA in *de novo* DNA methylation of the imprinted mouse Rasgrf1 locus. *Science* 2011, 332(6031):848-52.
- 25 Lee J. Epigenetic Regulation by Long Noncoding RNAs. *Science* 2012, 338(6113): 1435-1439.
- 26 Taylor DH, Chu ET, Spektor R, and Soloway PD. Long non-coding RNA regulation of reproduction and development. *Molecular Reproduction and Development* 2015, 82(12):932-56.
- 27 Nagano T, Mitchell JA, Sanz LA, Pauler FM, Ferguson-Smith AC, Feil F, et al. The Air Noncoding RNA Epigenetically Silences Transcription by Targeting G9a to Chromatin. *Science* 2008, 322(5908): 1717-1720. DOI: 10.1126/science.1163802
- 28 Plath K, Fang J, Mlynarczyk-Evans SK, Cao R, Worringer KA, Wang H, et al. Role of histone H3 lysine 27 methylation in X inactivation. *Science* 2003, 300: 131-135.
- 29 Latos P, Pauler FM, Koerner MV, Senergin HB, Hudson QJ, Stocsits RR, et al. Airn Transcriptional Overlap, But Not Its lncRNA Products, Induces Imprinted Igf2r Silencing. *Science* 2012, 1469-1472.
- 30 Orom UA, Derrien T, Beringer M, Gumireddy K, Gardini A, Bussotti G, et al. Long Noncoding RNAs with Enhancer-like Function in Human Cells. *Cell* 2010, 143(1): 46-58.
- 31 Pearsall RS, Plass C, Romano MA, Garrick MD, Shibata H, Hayashizaki Y, Held WA. A Direct Repeat Sequence at the Rasgrf1 Locus and Imprinted Expression. *Genomics* 1999 Jan 15; 55(2):194-201.
- 32 Kuramochi-Miyagawa S, Watanabe T, Gotoh K, Totoki Y, Toyoda A, Ikawa M, et al. DNA methylation of retrotransposon genes is regulated by Piwi family members MILI and MIWI2 in murine fetal testes. *Genes and Development* 2008; 22: 908-917. doi: 10.1101/gad.1640708
- 33 Herman H, Lu M, Anggraini M, Sikora A, Chang Y, Yoon BJ, and Soloway PD. Trans allele methylation and paramutation-like effects in mice. *Nature Genetics* 2003, 34(2): 199-292.
- 34 Alleman M, Sidorenko L, McGinnis K, Seshadri V, Dorweiler JE, White J, et al. An RNA-dependent RNA polymerase is required for paramutation in maize. *Nature* 2006, 442: 295-8.

- 
- 35 Rassoulzadegan M, Grandjean V, Gounon P, Vincent S, Gillot I, and Cuzin F. RNA-mediated non-mendelian inheritance of an epigenetic change in the mouse. *Nature* 2006, 441: 469-74.
- 36 de Vanssay A, Boug AL, Boivin A, Hermant C, Teysset L, Delmarre V, et al. Paramutation in *Drosophila* linked to emergence of a piRNA-producing locus. *Nature* 2012, 490: 112-5.
- 37 Taylor DH, McLean CM, Wu WL, Wang AB, and Soloway PD. Imprinted DNA methylation reconstituted at a non-imprinted locus. *Epigenetics & Chromatin* 2016, 9:41.
- 38 Urlinger S, Baron U, Thellmann M, Hasan MT, Bujard H, and Hillen W. Exploring the sequence space for tetracycline dependent transcriptional activators: Novel mutations yield expanded range and sensitivity. *Proceedings of the National Academy of Science* 2001, 97(14): 7963-7968.
- 39 Gossen M and Bujard H. Tight control of gene expression in mammalian cells by tetracycline-responsive promoters. *Proceedings of the National Academy of Science* 1992, 89: 5547-5551.
- 40 Baron U, Gossen M, and Bujard H. Co-regulation of two gene activities by tetracycline via a bidirectional promoter. *Nucleic Acids Research* 1997, 25: 2723-2729.
- 41 Drake NM, Park YJ, Shirali AS, Cleland TA, and Soloway PD. Imprint switch mutations at *Rasgrf1* support conflict hypothesis of imprinting and define a growth control mechanism upstream of IGF1. *Mamm Genome* 20(9-10):654-63. doi: 10.1007/s00335-009-9192-7
- 42 Hayashi S, Lewis P, Pevny L, and McMahan AP. Efficient gene modulation in mouse epiblast using a *Sox2Cre* transgenic mouse strain. *Mechanisms of Development* 2002, 119 Suppl 1:S97-S101.
- 43 Wutz A, Smrzka OW, Schweifer N, Schellander K, Wagner EF, and Barlow DP. Imprinted expression of the *Igf2r* gene depends on an intronic CpG island. *Nature* 1997, 389(6652): 745-9.
- 44 Yoon B, Herman H, Hu B, Park YJ, Lindroth A, Bell A, West AG, Chang Y, Stablewski A, Piel JC, Loukinov DI. *Rasgrf1* imprinting is regulated by a CTCF-dependent methylation-sensitive enhancer blocker. *Molecular and Cellular Biology* 2005 Dec 15;25(24):11184-90.
- 45 Downen JM, Fan ZP, Hnisz D, Ren G, Abraham BJ, Zhang LN, et al. Control of Cell Identity Genes Occurs in Insulated Neighborhoods in Mammalian Chromosomes. *Cell* 2014, 159(2): 374–387.
- 46 Sleutels F, Zwart R, Barlow DP. The non-coding Air RNA is required for silencing autosomal imprinted genes. *Nature* 2002 Feb 7;415(6873):810-3.
- 47 Li L and Chang HY. Physiological roles of long noncoding RNAs: Insights from knockout mice. *Trends in Cell Biology* 2014, 24(10): 594–602.

---

48 Goff LA and Rinn JL. Linking RNA biology to lncRNAs. *Genome Research* 2015, 25: 1456-1465.

49 Yin Y, Yan P, Lu J, Song G, Zhu Y, Li Z2, Zhao Y, Shen B, Huang X, Zhu H, Orkin SH, Shen X. Opposing Roles for the lncRNA Haunt and Its Genomic Locus in Regulating HOXA Gene Activation during Embryonic Stem Cell Differentiation. *Cell Stem Cell* 2015, 16(5):504-16.

50 Paralkar VR, Taborda CC, Huang P, Yao Y, Kossenkov AV, Prasad R, Luan J, Davies JOJ, Hughes JR, Hardison RC, Blobel GA, and Weiss MJ. Unlinking a lncRNA from its associated cis element. *Molecular Cell* 2016, 62(1), 104–110.

51 Amândio AR, Necsulea A, Joye E, Mascrez B, Duboule D (2016). *Hotair* Is Dispensable for Mouse Development. *PLoS Genetics* 12(12): e1006232.

52 Engreitz JM, Haines JE, Perez EM, Munson G, Chen J, Kane M, McDonel PE, Guttman M, and Lander E (2016). Local regulation of gene expression by lncRNA promoters, transcription and splicing. *Nature* 539, 452–455.

53 Kopp F, Mendell JT. Functional Classification and Experimental Dissection of Long Noncoding RNAs. *Cell*. 2018 Jan 25;172(3):393-407.

54 Ogawa Y and Lee JT (2003). Xite, X-inactivation intergenic transcription elements that regulate the probability of choice. *Molecular Cell* 11(3):731-43.

55 Zhang Y, Shu J, Si J, Shen L, Estecia MRH, and Issa JJ. Repetitive elements and enforced transcriptional repression co-operate to enhance DNA methylation spreading into a promoter CpG-island. *Nucleic Acids Research* 2012 Aug, 40(15): 7257-7268.

56 Quilez J, Guilmatre A, Garg P, Highnam G, Gymrek M, Erlich Y, et al. Polymorphic tandem repeats within gene promoters act as modifiers of gene expression and DNA methylation in humans. *Nucleic Acids Research* 2016 May 5; 44(8): 3750-3762. doi: 10.1093/nar/gkw219

57 Thorvaldsen JL, Duran KL, Bartolomei MS. Deletion of the H19 differentially methylated domain results in loss of imprinted expression of H19 and Igf2. *Genes & development*. 1998 Dec 1;12(23):3693-702.

<sup>58</sup> Hark AT, Schoenherr CJ, Katz DJ, Ingram RS, Levorse JM, Tilghman SM. CTCF mediates methylation-sensitive enhancer-blocking activity at the H19/Igf2 locus. *Nature*. 2000 May;405(6785):486.

<sup>59</sup> Thorvaldsen JL, Mann MR, Nwoko O, Duran KL, Bartolomei MS. Analysis of sequence upstream of the endogenous H19 gene reveals elements both essential and dispensable for imprinting. *Molecular and cellular biology*. 2002 Apr 15;22(8):2450-62.

<sup>60</sup> Schoenherr CJ, Levorse JM, Tilghman SM. CTCF maintains differential methylation at the Igf2/H19 locus. *Nature genetics*. 2003 Jan;33(1):66.



- 
- <sup>61</sup> Fedoriw AM, Stein P, Svoboda P, Schultz RM, Bartolomei MS. Transgenic RNAi reveals essential function for CTCF in H19 gene imprinting. *Science*. 2004 Jan 9;303(5655):238-40.
- 62 O'Connor L, Gilmour J, and Bonifer C. The Role of the Ubiquitously Expressed Transcription Factor Sp1 in Tissue-specific Transcriptional Regulation and in Disease. *Yale Journal of Biology and Medicine* 2016, 89: 413-525.
- 63 Suzuki T, Kimura A, Nagai R, Horikoshi M (2000). Regulation of interaction of the acetyltransferase region of p300 and the DNA-binding domain of Sp1 on and through DNA binding. *Genes Cells* 5(1): 29-41.
- 64 Zhao S, Venkatasubbarao K, Li S, and Freeman JW (2003). Requirement of a Specific Sp1 Site for Histone Deacetylase-mediated Repression of Transforming Growth Factor  $\beta$  Type II Receptor Expression in Human Pancreatic Cancer Cells. *Cancer Research* 63, 2624-2630.
- 65 Deshane J, Kim J, Bolisetty S, Hock TD, Hill-Kapturczak N, and Agarwal A (2010). Sp1 regulates chromatin looping between an intronic enhancer and distal promoter of the human heme oxygenase-1 gene in renal cells. *Journal of Biological Chemistry* 285(22): 16476-86.
- 66 Sumimoto Y, Higashitsuji H, Higashitsuji H, Liu Y, Fujita T, Kajurai T, Candeias MM, Itoh K, Chiba T, and Fujita J (2012). Identification of a novel enhancer that binds Sp1 and contributes to induction of cold-inducible RNA-binding protein (cirp) expression in mammalian cells. *BMC Biotechnology* 12:72.
- 67 Todd AK and Neidle S. The relationship of potential G-quadruplex sequences in cis-upstream regions of the human genome to SP1-binding elements. *Nucleic Acids Research* 2008, 36(8): 2700-4.
- 68 Raiber E, Kranaster R, Lam E, Nikan M, and Balasubramanian S. A non-canonical DNA structure is a binding motif for the transcription factor SP1 in vitro. *Nucleic Acids Research* 2012, 40(4): 1499-1508.
- 69 Fukuhara M, Ma Y, Nagasawa K, and Toyosihma F. A G-quadruplex structure at the 5' end of the H19 coding region regulates H19 transcription. *Scientific Reports* 2017, 7, Article number: 45815. doi:10.1038/srep45815
- 70 Brown JL, Grau DJ, DeVido SK, and Kassis JA. Sp1/KLF binding site is important for the activity of a Polycomb group response element from the *Drosophila engrailed* gene. *Nucleic Acids Research* 2005 33(16): 5181-5189. doi:10.1093/nar/gki827
- 71 Bengani H, Ganapathi M, Singh GP and Brahmachari V (2007). Mining of Putative cis-acting Elements for Chromatin Mediated Regulation of Hox Genes in Mammals by in-silico Analysis. *Journal of Experimental Zoology (Mol Dev Evol)* 2007, 308B:384-395.
- 72 Pastor WA, Stroud H, Nee K, Liu W, Pezic D, Lee SA, et al. MORC1 represses transposable elements in the mouse male germline. *Nat Commun*. 2014 Dec 12; 5: 5795. doi: 10.1038/ncomms6795

- 
- 73 Quenneville S, Verde G, Corsinotti A, Kapopoulou A, Jakobsson J, Offner S, et al. In embryonic stem cells, ZFP57/KAP1 recognize a methylated hexanucleotide to affect chromatin and DNA methylation of imprinting control regions. *Molecular Cell*. 2011 Nov 4;44(3):361-72. doi: 10.1016/j.molcel.2011.08.032.
- 74 Alexander KA, Wang X, Shibata M, Clark AG, García-García MJ. TRIM28 controls genomic imprinting through distinct mechanisms during and after early genome-wide reprogramming. *Cell Reports*. 2015;13(6):1194-1205. doi:10.1016/j.celrep.2015.09.078.
- 75 Wiznerowicz M, Jakobsson J, Szulc J, Liao S, Quazzola A, Beermann F, et al. The Kru" ppe-associated Box Repressor Domain Can Trigger de Novo Promoter Methylation during Mouse Early Embryogenesis. *J Biol Chem* 2007, 282(47): 34535-34541.
- 76 Brideau C, Kauppinen KP, Holmes R, and Soloway PD. A Non-Coding RNA Within the Rasgrf1 Locus in Mouse Is Imprinted and Regulated by Its Homologous Chromosome in Trans. *PLoS ONE* 2010: e13784.  
<https://doi.org/10.1371/journal.pone.0013784>
- 77 Park YJ, Herman H, Gao Y, Lindroth AM, Hu BY, Murphy PJ, Putnam JR, and Soloway PD. Sequences Sufficient for Programming Imprinted Germline DNA Methylation Defined. *PLoS ONE* 2012, 7(3): e33024.
- 78 Cong L, Ran FA, Cox D, Lin S, Barretto R, Habib N, Hsu PD, Wu X, Jiang W, Marraffini LA, Zhang F. Multiplex Genome Engineering Using CRISPR/Cas Systems. *Science* 2013, 339(6121):819-23.
- 79 Eggan K, Akutsu H, Loring J, Jackson-Grusby L, Klemm M, Rideout WM, et al. Hybrid vigor, fetal overgrowth, and viability of mice derived by nuclear cloning and tetraploid embryo complementation. *PNAS* 2001 May 22, 98(11): 6209-6214.
- 80 Chi W, Wu E, and Morgan BA. Dermal papilla cell number specifies hair size, shape and cycling and its reduction causes follicular decline. *Development* 2013, 140(8): 1676-1683. doi: 10.1242/dev.090662
- 81 Gentleman RC, Carey VJ, Bates DM, Bolstad B, Dettling M, Dudoit S, et al. Bioconductor: open software development for computational biology and bioinformatics. *Genome Biology* 2004, 5:R80. doi: <https://doi.org/10.1186/gb-2004-5-10-r80>
- 82 Duselis, A. R., Vrana, P. B. Retrieval of Mouse Oocytes. *J. Vis. Exp.* 2007, (3), e185, doi:10.3791/185.
- 83 Laird PW, Zijderveld A, Linders K, Rudnicki MA, Jaenisch R, and Berns A. Simplified mammalian DNA isolation procedure. *Nucleic Acids Res* 1991, 19(15): 4293.
- 84 Goodrich R, Johnson G, and Krawetz SA. The preparation of human spermatozoal RNA for clinical analysis. *Archives of Andrology* 2007, 53(3): 161-7.



---

85 Wu H, de Gannes MK, Luchetti G, and Pilsner JR. Rapid method for the isolation of mammalian sperm DNA. *Biotechniques* 2014, 59(6): 293-300.

86 Kumaki Y, Oda M, and Okano M. QUMA: quantification tool for methylation analysis. *Nucleic Acids Research* 2008, 36(Web Server issue), W170–W175.

**a** *Rasgrf1*<sup>WT</sup>

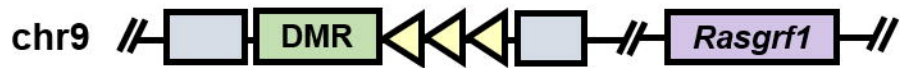

*Rasgrf1*<sup>tm5.1PDS</sup>

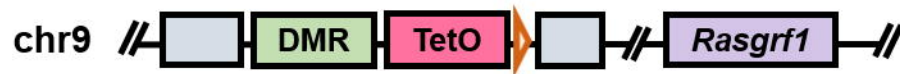

**b**

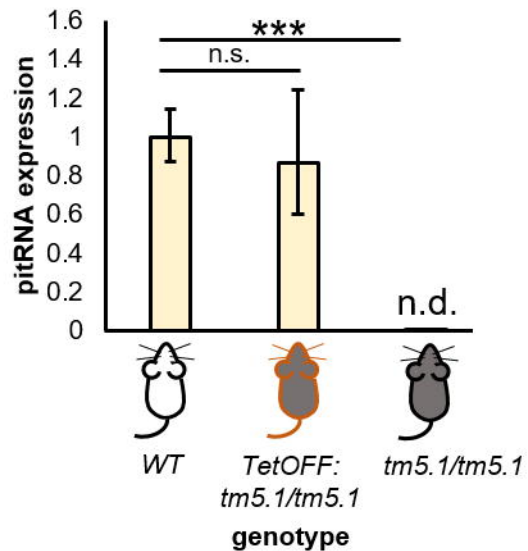

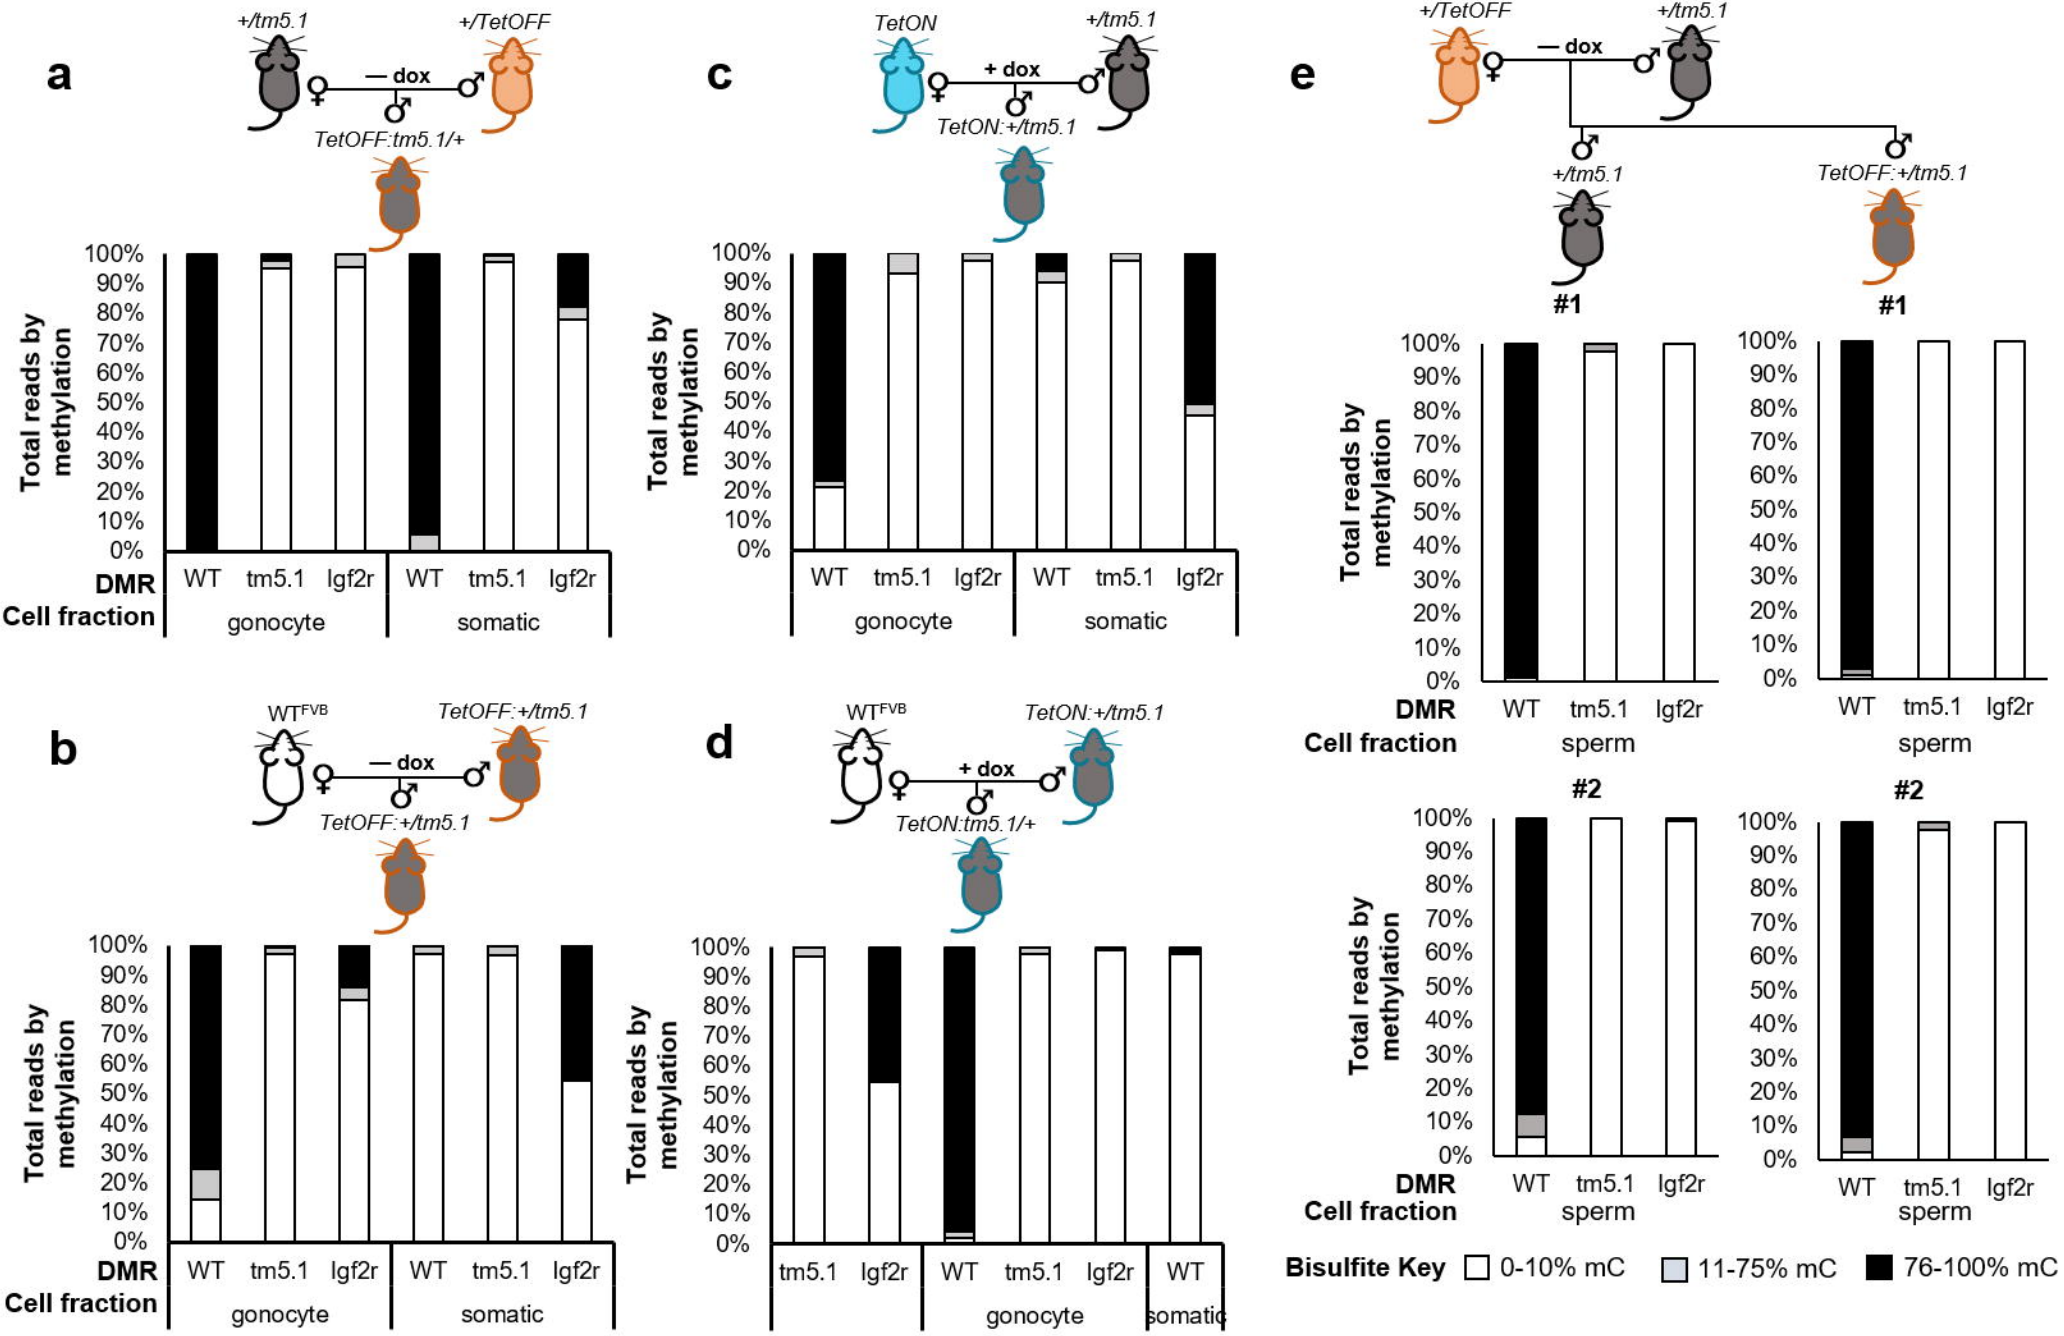

**a**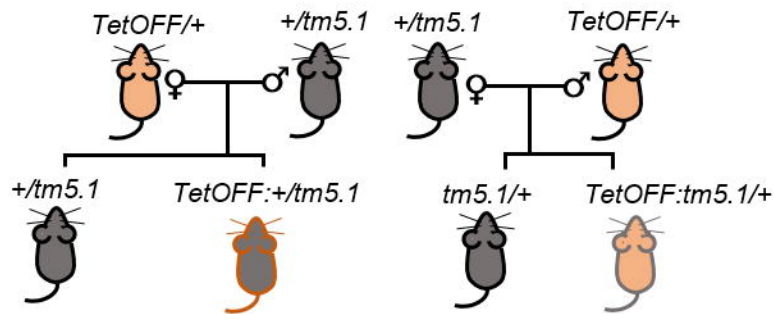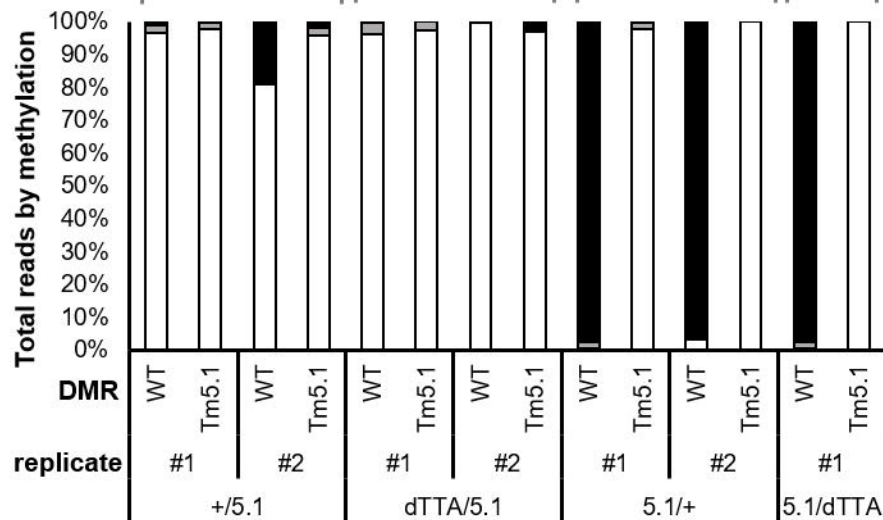**b**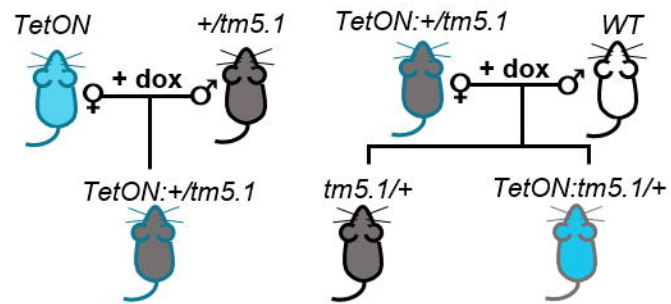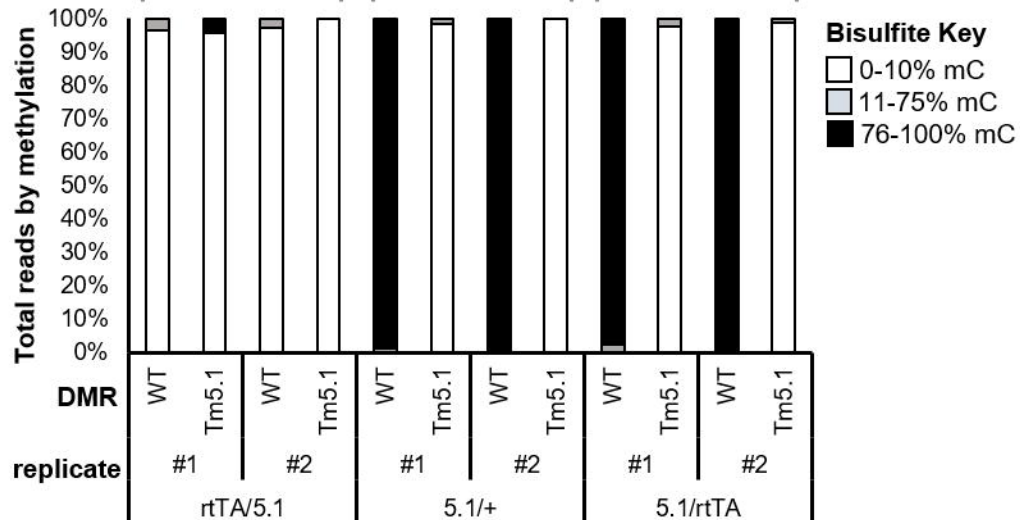

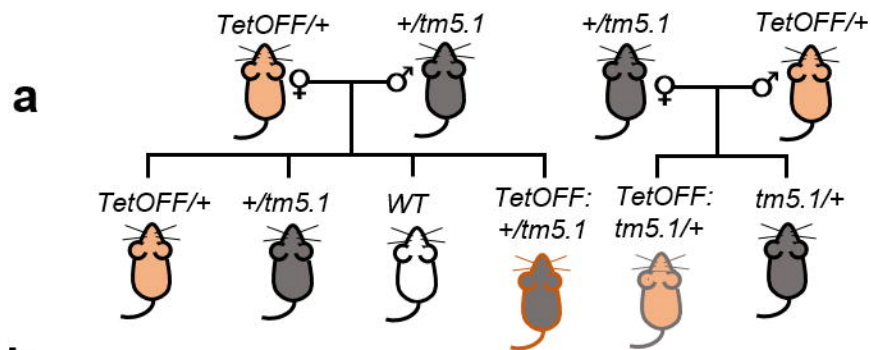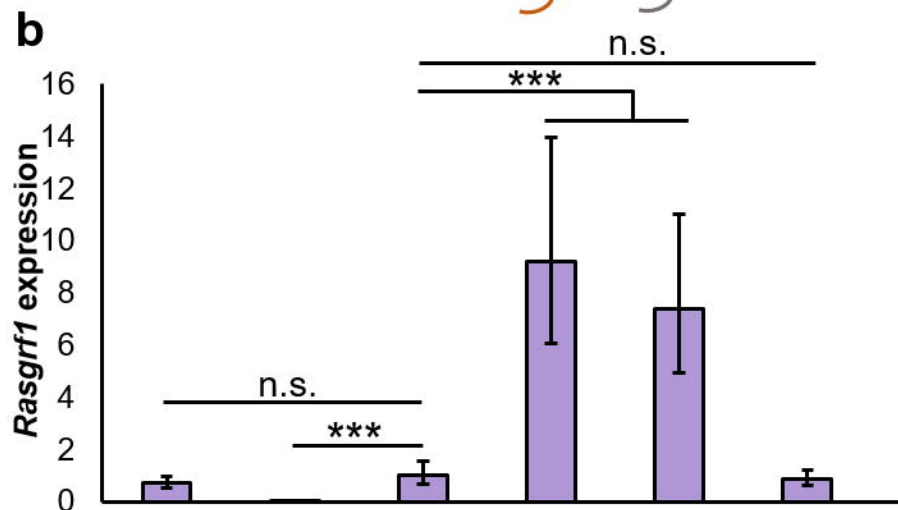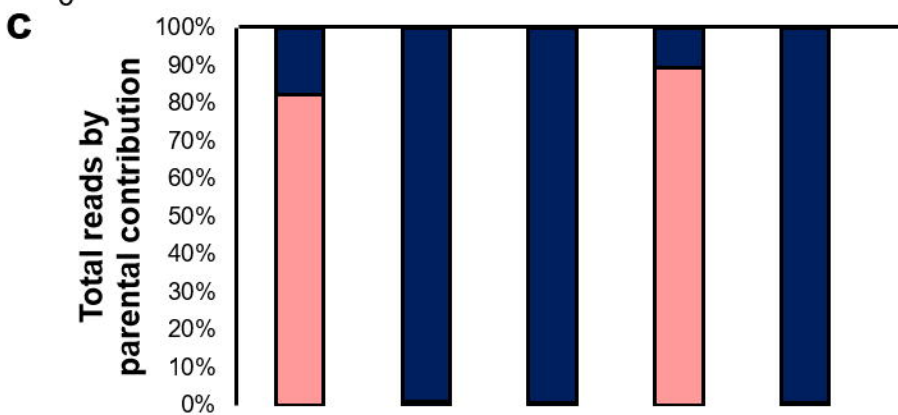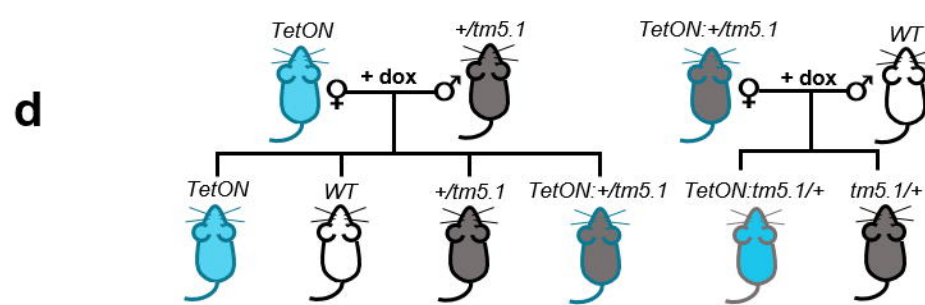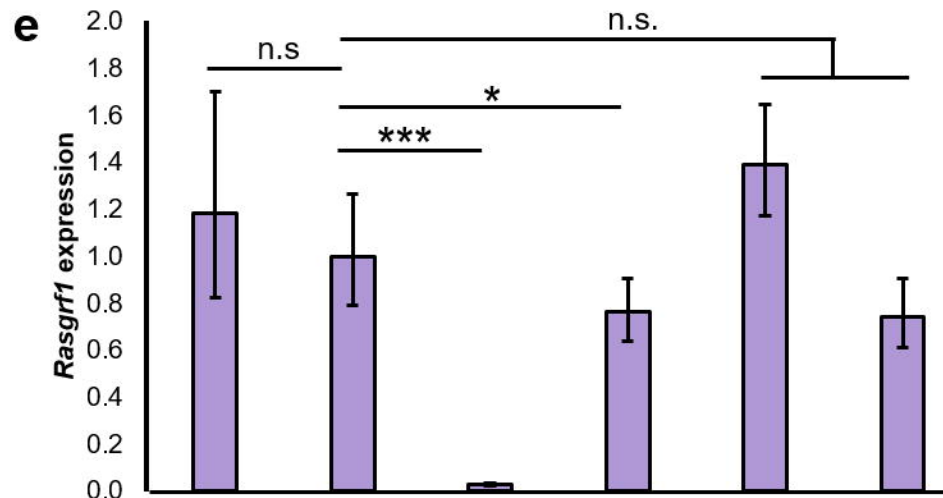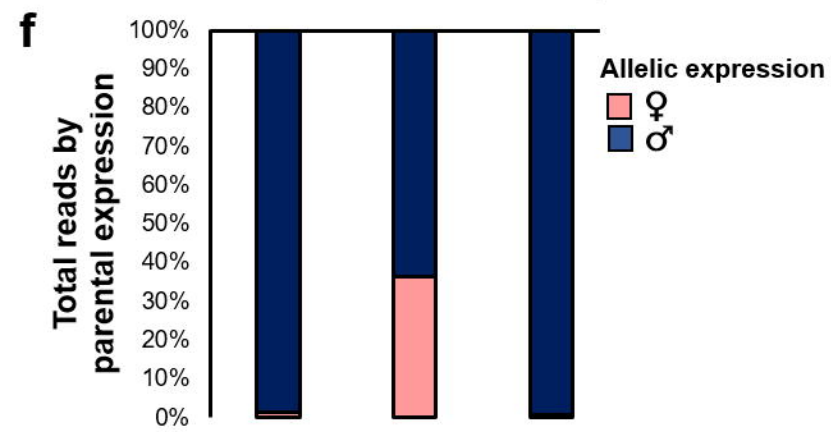

a)

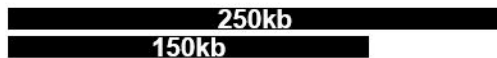

b)

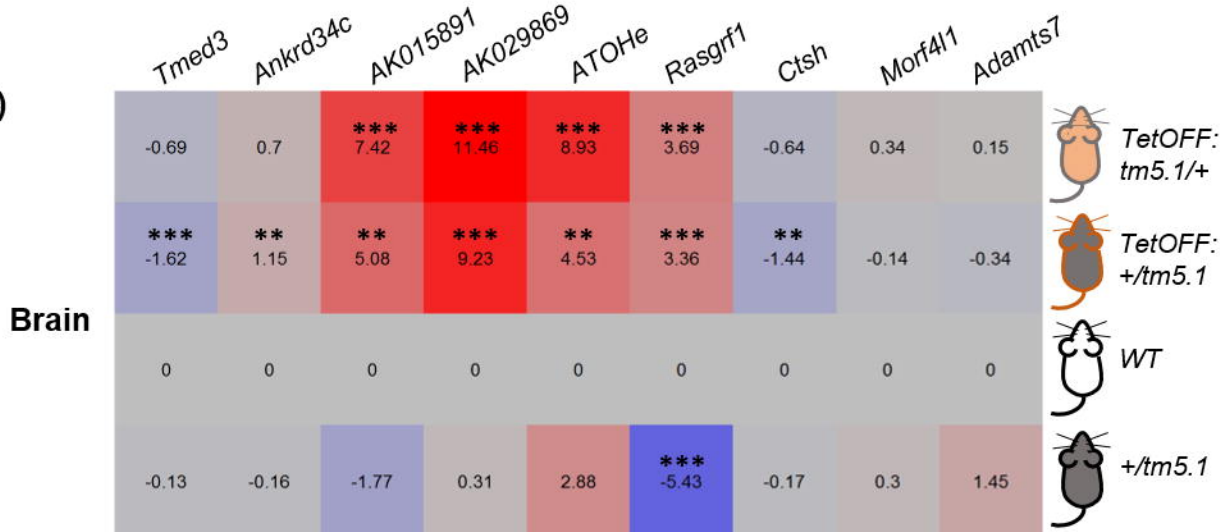

c)

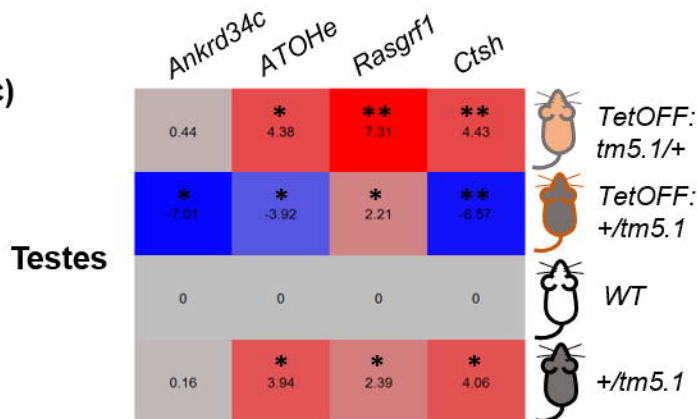

♂ embryonic germline

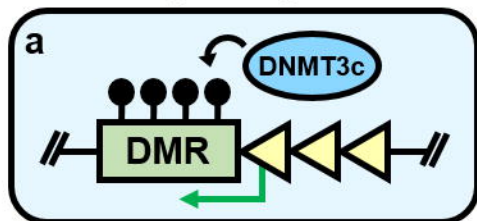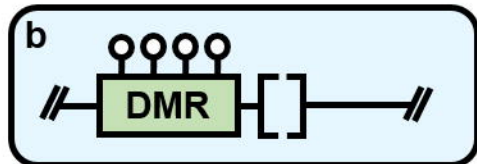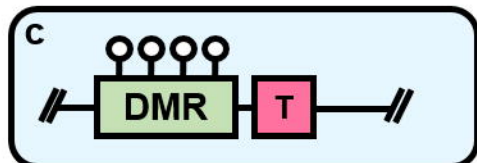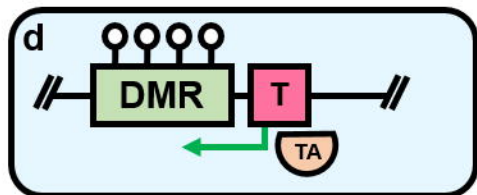

neonatal brain

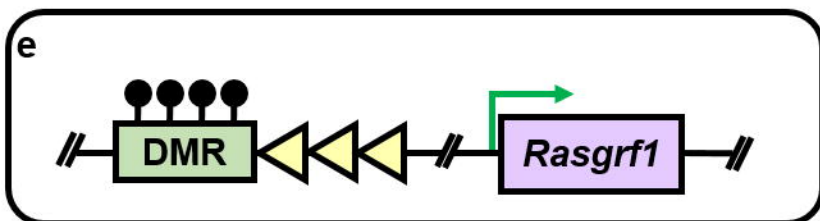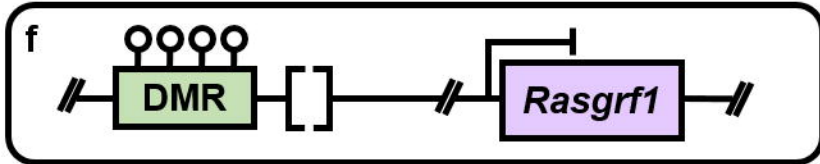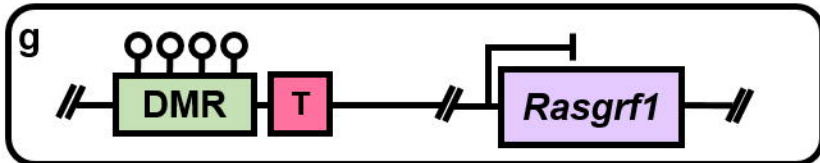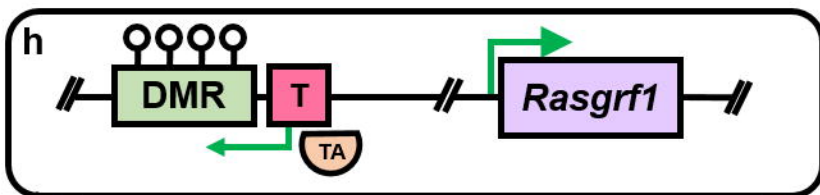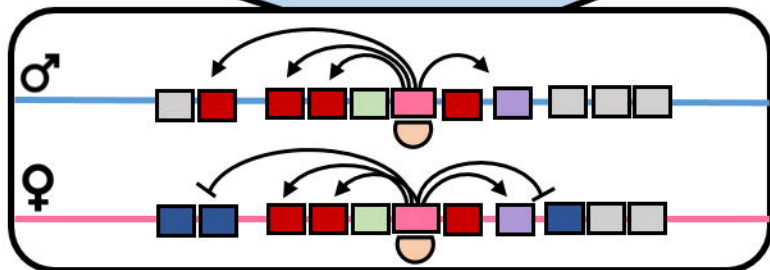

Source: http://biorxiv.org/content/10.1101/297465v1.full.pdf
